# Supplementary material
Source: PubMed Central journal article supplement (PMC7613461)
Supplement: EMS151772-supplement-Supp_info.pdf [file EMS151772-supplement-Supp_info.pdf]

## Supporting Information

### Prediction of Broad-spectrum Pathogen Attachment to Coating Materials for Biomedical Devices

*Paulius Mikulskis†, Andrew Hook†, Adam A. Dundas†¶, Derek Irvine¶, Olutoba Sanni†, Daniel Anderson#, Robert Langer#, Morgan R. Alexander†\*, Paul Williams§ and David A. Winkler&†\**

*† School of Pharmacy, University of Nottingham, Nottingham NG7 2RD, UK.*

*§ Centre for Biomolecular Sciences, School of Life Sciences, University of Nottingham, Nottingham NG7 2RD, UK.*

*¶ Faculty of Engineering, University of Nottingham, Nottingham NG7 2RD, UK*

*# Koch Institute for Integrative Cancer Research, MIT, Cambridge MA, 02139-4307, USA & Department of Chemistry and Physics, La Trobe Institute for Molecular Science, La Trobe University, Kingsbury Drive, Melbourne, Victoria 3086, Australia; Monash Institute for Pharmaceutical Sciences, Parkville 3052, Australia; School of Chemical and Physical Sciences, Flinders University 5046, Australia*

Corresponding authors email addresses: [d.winkler@latrobe.edu.au](mailto:d.winkler@latrobe.edu.au);  
[david.winkler@monash.edu](mailto:david.winkler@monash.edu); [morgan.alexander@nottingham.ac.uk](mailto:morgan.alexander@nottingham.ac.uk)

**Table S1.** Computed molecular descriptors used in the models

| <b>Descriptor</b> | <b>PA</b> | <b>SA</b> | <b>UPEC</b> | <b>Multi<br/>(linear)</b> | <b>Multi<br/>(BRANN)</b> |
|-------------------|-----------|-----------|-------------|---------------------------|--------------------------|
| ATSC2s            | ✓         |           |             | ✓                         | ✓                        |
| ATSC4s            |           | ✓         |             |                           |                          |
| ATSC6s            | ✓         |           |             | ✓                         | ✓                        |
| ATSC7s            |           | ✓         |             |                           |                          |
| ATSC8s            | ✓         | ✓         |             | ✓                         | ✓                        |
| CENT              |           | ✓         |             |                           |                          |
| CSI               | ✓         |           |             |                           |                          |
| GMTIV             |           | ✓         | ✓           |                           |                          |
| IDMT              | ✓         | ✓         | ✓           |                           |                          |
| J_X               | ✓         | ✓         | ✓           |                           |                          |
| IDET              | ✓         |           |             |                           |                          |
| P_VSA_LogP_3      |           | ✓         |             | ✓                         | ✓                        |
| P_VSA_LogP_4      | ✓         | ✓         |             | ✓                         | ✓                        |
| P_VSA_MR_1        | ✓         |           |             | ✓                         | ✓                        |
| P_VSA_MR_2        | ✓         | ✓         |             | ✓                         | ✓                        |

| <b>Descriptor</b> | <b>PA</b> | <b>SA</b> | <b>UPEC</b> | <b>Multi<br/>(linear)</b> | <b>Multi<br/>(BRANN)</b> |
|-------------------|-----------|-----------|-------------|---------------------------|--------------------------|
| P_VSA_MR_5        |           |           | ✓           |                           |                          |
| P_VSA_i_3         |           | ✓         |             | ✓                         | ✓                        |
| P_VSA_s_6         | ✓         |           | ✓           | ✓                         | ✓                        |
| P_VSA_ppp_con     | ✓         | ✓         |             |                           |                          |
| P_VSA_ppp_L       | ✓         |           |             |                           |                          |
| P_VSA_ppp_cyc     |           |           |             |                           |                          |
| P_VSA_ppp_ter     | ✓         |           |             | ✓                         | ✓                        |
| T(O..O)           |           |           | ✓           |                           |                          |
| SMTIV             |           | ✓         |             |                           |                          |
| TIE               | ✓         |           | ✓           |                           |                          |
| TIC1              |           | ✓         |             | ✓                         | ✓                        |
| TIC2              |           |           |             | ✓                         | ✓                        |
| TIC5              | ✓         |           |             | ✓                         | ✓                        |
| Wi_Dt             | ✓         | ✓         |             | ✓                         |                          |
| Wap               |           | ✓         |             |                           |                          |
| Wi_Dz(v)          |           |           | ✓           | ✓                         | ✓                        |

| <b>Descriptor</b> | <b>PA</b> | <b>SA</b> | <b>UPEC</b> | <b>Multi<br/>(linear)</b> | <b>Multi<br/>(BRANN)</b> |
|-------------------|-----------|-----------|-------------|---------------------------|--------------------------|
| ZM1Kup            | ✓         |           |             | ✓                         | ✓                        |
| ZM2Per            |           | ✓         |             | ✓                         | ✓                        |
| ZM2Kup            |           |           |             | ✓                         | ✓                        |
| QW_L              | ✓         |           |             |                           |                          |
| Wi_D/Dt           |           |           |             | ✓                         | ✓                        |
| I <sub>SA</sub>   |           |           |             | ✓                         | ✓                        |
| I <sub>PA</sub>   |           |           |             | ✓                         | ✓                        |
| I <sub>UPEC</sub> |           |           |             | ✓                         | ✓                        |

**Table S2. Explanation of molecular descriptors**

| Molecular descriptor      | Description                                                       |
|---------------------------|-------------------------------------------------------------------|
| ATSC2s                    | Centred Broto-Moreau autocorrelation of lag 2 weighted by I-state |
| ATSC4s                    | Centred Broto-Moreau autocorrelation of lag 4 weighted by I-state |
| ATSC6s                    | Centred Broto-Moreau autocorrelation of lag 6 weighted by I-state |
| ATSC7s                    | Centred Broto-Moreau autocorrelation of lag 7 weighted by I-state |
| ATSC8s                    | Centred Broto-Moreau autocorrelation of lag 8 weighted by I-state |
| CENT                      | Centralization                                                    |
| CSI                       | Eccentric connectivity index                                      |
| GMTI                      | Gutman Molecular Topological Index                                |
| GMTIV                     | Gutman Molecular Topological Index by valence vertex degrees      |
| IDET                      | Total information content on the distance equality                |
| IDMT                      | Total information content on the distance magnitude               |
| J_X                       | Balaban-like index from chi matrix                                |
| P_VSA_LogP_3 <sup>1</sup> | P_VSA-like on LogP, bin 3                                         |
| P_VSA_LogP_4              | P_VSA-like on LogP, bin 4                                         |
| P_VSA_MR_1                | P_VSA-like on Molar Refractivity, bin 1                           |

| Molecular descriptor | Description                                                         |
|----------------------|---------------------------------------------------------------------|
| P_VSA_MR_2           | P_VSA-like on Molar Refractivity, bin 2                             |
| P_VSA_MR_5           | P_VSA-like on Molar Refractivity, bin 5                             |
| P_VSA_i_3            | P_VSA-like on ionization potential, bin 3                           |
| P_VSA_ppp_L          | P_VSA-like on potential pharmacophore points, L - lipophilic        |
| P_VSA_ppp_con        | P_VSA-like on potential pharmacophore points, conjugated atoms      |
| P_VSA_ppp_cyc        | P_VSA-like on potential pharmacophore points, atoms in rings        |
| P_VSA_ppp_ter        | P_VSA-like on potential pharmacophore points, terminal atoms        |
| P_VSA_s_6            | P_VSA-like on I-state, bin 6                                        |
| QW_L                 | Quasi-Wiener index (Kirchhoff number) from Laplace matrix           |
| SMTIV                | Schultz Molecular Topological Index by valence vertex degrees       |
| T(O..O)              | Sum of topological distances between O..O                           |
| TIC1 <sup>2</sup>    | Total Information Content index (neighbourhood symmetry of 1-order) |
| TIC2                 | Total Information Content index (neighbourhood symmetry of 2-order) |
| TIC5                 | Total Information Content index (neighbourhood symmetry of 5-order) |
| TIE                  | E-state topological parameter                                       |
| Wap                  | All-path Wiener index                                               |

| Molecular<br>descriptor | Description                                                 |
|-------------------------|-------------------------------------------------------------|
| Wi_D/Dt                 | Wiener-like index from distance/detour matrix               |
| Wi_Dt                   | Wiener-like index from detour matrix (detour index)         |
| Wi_Dz(v)                | Wiener-like index from Barysz matrix weighted by VdW volume |
| ZM1Kup                  | First Zagreb index by Kupchik vertex degrees                |
| ZM2Kup                  | Second Zagreb index by Kupchik vertex degrees               |
| ZM2Per                  | Second Zagreb index by perturbation vertex degrees          |

**Table S3.** Experimental ToF-SIMS ion peak features used in modelling.

| Descriptor    | PA | SA | UPEC | Multi-pathogen<br>(linear) | Multi-pathogen<br>(BRANN) | Ion present in monomers (Figure S1<br>for monomer names) |
|---------------|----|----|------|----------------------------|---------------------------|----------------------------------------------------------|
| $C^-$         | X  |    |      |                            |                           | All                                                      |
| $C_{13}H_9^+$ |    | X  |      |                            |                           | All but 5                                                |
| $C_2H_3^+$    | X  |    |      | X                          | X                         | All                                                      |
| $C_2H_3O^-$   |    | X  |      |                            |                           | All                                                      |
| $C_2H_3O^+$   |    | X  |      |                            |                           | All but 5                                                |
| $C_2H_4^+$    |    | X  |      |                            |                           | All                                                      |
| $C_2H_4N^+$   |    |    | X    |                            |                           | E; 8,12,13,15 from contamination                         |
| $C_2H_5^+$    | X  |    | X    |                            |                           | 5                                                        |
| $C_2H_5O^+$   | X  |    |      |                            |                           | All but 5, A, B, C, D, E, F                              |
| $C_2H_5O_4^+$ | X  | X  |      |                            |                           | 6                                                        |
| $C_2HO$       | X  |    |      |                            |                           | All                                                      |
| $C_3H^-$      | X  |    |      | X                          | X                         | 5, 6, 7, A, B, E, F                                      |
| $C_3H_3^+$    | X  | X  |      | X                          | X                         | All                                                      |
| $C_3H_3O^+$   | X  | X  |      | X                          | X                         | All                                                      |
| $C_3H_3O_2^-$ | X  | X  |      |                            |                           | All                                                      |
| $C_3H_5O^+$   | X  |    |      |                            |                           | 3, 6                                                     |
| $C_3H_6^+$    |    |    | X    |                            |                           | All                                                      |



| <b>Descriptor</b> | <b>PA</b> | <b>SA</b> | <b>UPEC</b> | <b>Multi-pathogen (linear)</b> | <b>Multi-pathogen (BRANN)</b> | <b>Ion present in monomers (Figure S1 for monomer names)</b> |
|-------------------|-----------|-----------|-------------|--------------------------------|-------------------------------|--------------------------------------------------------------|
| $C_3H_7^+$        | X         | X         |             | X                              | X                             | All                                                          |
| $C_3H_7O_2^+$     |           | X         |             |                                |                               | 3,6,16, A,E                                                  |
| $C_3HO^+$         |           | X         |             | X                              | X                             | All but 3, 4, 5, 6, 9, B                                     |
| $C_4H^+$          | X         |           |             | X                              | X                             | 7, 9, 14, D, F                                               |
| $C_4H_{12}NO^+$   | X         |           |             |                                |                               | E                                                            |
| $C_4H_3^+$        |           |           | X           |                                |                               | 1,2,4,5,6,16                                                 |
| $C_4H_6^+$        | X         |           | X           |                                |                               | All                                                          |
| $C_4H_6O^+$       | X         | X         |             |                                |                               | 12                                                           |
| $C_4H_6O_2^+$     |           | X         |             |                                |                               | All but 5,14,B,C,D,F                                         |
| $C_4H_7^+$        |           | X         |             | X                              | X                             | All                                                          |
| $C_4H_7O_2^+$     | X         |           |             |                                |                               | 3                                                            |
| $C_5H_3^+$        | X         |           |             |                                |                               | 7, 14                                                        |
| $C_5H_6O^+$       |           | X         |             |                                |                               | All                                                          |
| $C_5H_7^+$        |           |           | X           |                                |                               | All                                                          |
| $C_5H_7O_2^+$     | X         |           |             |                                |                               | All                                                          |
| $C_5H_8O_2^+$     | X         |           |             |                                |                               | All                                                          |
| $C_5H_9^+$        |           |           | X           |                                |                               | All                                                          |
| $C_6H_{11}^+$     | X         |           |             | X                              | X                             | 1, 4, 5, 6, 11, 13, A                                        |

| Descriptor    | PA | SA | UPEC | Multi-pathogen<br>(linear) | Multi-pathogen<br>(BRANN) | Ion present in monomers (Figure S1<br>for monomer names) |
|---------------|----|----|------|----------------------------|---------------------------|----------------------------------------------------------|
| $C_6H_{13}^+$ | X  |    |      |                            |                           | All                                                      |
| $C_6H_2^+$    |    | X  |      |                            |                           | 1,4,7,8,9,10,13,14,15,B,D,F                              |
| $C_6H_5^+$    | X  |    |      |                            |                           | 7, 14                                                    |
| $C_6H_5O^-$   |    |    | X    |                            |                           | 7                                                        |
| $C_6H_6O^+$   | X  |    |      | X                          | X                         | 7                                                        |
| $C_7H_{13}^+$ | X  |    |      |                            |                           | All                                                      |
| $C_7H_5O^+$   | X  |    |      |                            |                           | 14                                                       |
| $C_8H_{12}^+$ | X  |    |      |                            |                           | All                                                      |
| $C_8H_9O^+$   | X  |    |      | X                          | X                         | 7, 9                                                     |
| $C_9H_{13}^+$ | X  |    |      |                            |                           | All                                                      |
| $CH_3^+$      |    |    | X    |                            |                           | All                                                      |
| $CH_3O^+$     |    | X  |      |                            |                           | 14,16                                                    |
| $CHO^+$       | X  | X  |      | X                          | X                         | All but 5                                                |
| WCA           |    |    | X    | X                          | X                         | N/A                                                      |
| $I_{SA}$      |    |    |      | X                          | X                         | N/A                                                      |
| $I_{PA}$      |    |    |      | X                          | X                         | N/A                                                      |
| $I_{UPEC}$    |    |    |      | X                          | X                         | N/A                                                      |

**Table S4.** Correlation of molecular descriptors with logF

| PA           |      | SA            |       | UPEC         |       |
|--------------|------|---------------|-------|--------------|-------|
| ATSC2s       | 0.18 | ATSC4s        | -0.09 | ATSC4s       | -0.22 |
| ATSC6s       | 0.07 | ATSC7s        | 0.07  | ATSC7s       | -0.11 |
| ATSC7s       | 0.19 | ATSC8s        | -0.05 | ATSC8s       | -0.18 |
| ATSC8s       | 0.08 | CENT          | -0.01 | CENT         | -0.03 |
| CENT         | 0.35 | CSI           | 0.00  | GMTI         | -0.02 |
| CSI          | 0.37 | GMTIV         | 0.00  | GMTIV        | 0.00  |
| GMTI         | 0.34 | IDMT          | -0.01 | IDMT         | -0.03 |
| GMTIV        | 0.37 | J_X           | 0.00  | J_X          | 0.02  |
| IDET         | 0.38 | P_VSA_LogP_3  | 0.41  | P_VSA_LogP_4 | -0.05 |
| IDMT         | 0.34 | P_VSA_LogP_4  | -0.13 | P_VSA_MR_2   | -0.10 |
| J_X          | 0.36 | P_VSA_MR_2    | -0.10 | P_VSA_MR_5   | 0.01  |
| P_VSA_LogP_4 | 0.28 | P_VSA_i_3     | -0.02 | P_VSA_s_6    | 0.11  |
| P_VSA_MR_1   | 0.37 | P_VSA_ppp_con | 0.04  | T(O..O)      | 0.03  |
| P_VSA_MR_2   | 0.21 | SMTIV         | 0.00  | TIE          | 0.03  |
| P_VSA_MR_5   | 0.31 | TIC1          | -0.01 | Wi_Dt        | -0.03 |
| P_VSA_MR_6   | 0.15 | Wap           | -0.04 | Wi_Dz(v)     | -0.02 |

| <b>PA</b>     |      | <b>SA</b> |       | <b>UPEC</b> |       |
|---------------|------|-----------|-------|-------------|-------|
| P_VSA_ppp_L   | 0.13 | Wi_Dt     | -0.01 | ZM1Kup      | -0.02 |
| P_VSA_ppp_con | 0.12 | ZM2Per    | -0.01 | ZM2Kup      | -0.04 |
| P_VSA_ppp_cyc | 0.10 |           |       |             |       |
| P_VSA_ppp_ter | 0.13 |           |       |             |       |
| P_VSA_s_6     | 0.36 |           |       |             |       |
| QW_L          | 0.34 |           |       |             |       |
| SMTIV         | 0.36 |           |       |             |       |
| TIC2          | 0.37 |           |       |             |       |
| TIC5          | 0.38 |           |       |             |       |
| TIE           | 0.36 |           |       |             |       |
| Wi_D/Dt       | 0.39 |           |       |             |       |
| Wi_Dt         | 0.34 |           |       |             |       |
| Wi_Dz(v)      | 0.34 |           |       |             |       |
| ZM1Kup        | 0.39 |           |       |             |       |

**Table S5.** Correlation of experimental feature descriptors with logF (>0.5 in bold)

| PA                                                        | SA    |                                                           |              |                                                            | UPEC  |                                                           |       |                                                |              |
|-----------------------------------------------------------|-------|-----------------------------------------------------------|--------------|------------------------------------------------------------|-------|-----------------------------------------------------------|-------|------------------------------------------------|--------------|
| C <sup>-</sup>                                            | -0.05 | C <sub>3</sub> H <sub>3</sub> O <sub>2</sub> <sup>-</sup> | 0.09         | C <sub>5</sub> H <sub>7</sub> O <sub>2</sub> <sup>+</sup>  | -0.02 | CHO <sup>+</sup>                                          | -0.17 | CH <sub>3</sub> <sup>+</sup>                   | 0.17         |
| CH <sup>+</sup>                                           | -0.09 | C <sub>3</sub> H <sub>5</sub> <sup>+</sup>                | -0.22        | C <sub>5</sub> H <sub>8</sub> O <sub>2</sub> <sup>+</sup>  | 0.26  | CH <sub>5</sub> O <sup>+</sup>                            | -0.17 | <b>C<sub>2</sub>H<sub>4</sub>N<sup>+</sup></b> | <b>0.52</b>  |
| CH <sup>-</sup>                                           | 0.02  | C <sub>3</sub> H <sub>5</sub> O <sup>+</sup>              | 0.38         | C <sub>6</sub> H <sub>10</sub> <sup>+</sup>                | -0.19 | C <sub>13</sub> H <sub>9</sub> <sup>+</sup>               | 0.02  | C <sub>2</sub> H <sub>5</sub> <sup>+</sup>     | -0.32        |
| CHO <sup>+</sup>                                          | 0.01  | C <sub>3</sub> H <sub>5</sub> O <sub>2</sub> <sup>+</sup> | 0.16         | C <sub>6</sub> H <sub>11</sub> <sup>+</sup>                | -0.07 | C <sub>2</sub> H <sub>3</sub> <sup>-</sup>                | -0.34 | C <sub>3</sub> H <sub>6</sub> <sup>+</sup>     | 0.06         |
| CH <sub>2</sub> F <sup>+</sup>                            | -0.01 | C <sub>3</sub> H <sub>7</sub> <sup>+</sup>                | -0.21        | C <sub>6</sub> H <sub>12</sub> O <sub>2</sub> <sup>+</sup> | 0.03  | C <sub>2</sub> H <sub>3</sub> O <sup>+</sup>              | -0.01 | C <sub>4</sub> H <sub>3</sub> <sup>+</sup>     | -0.07        |
| C <sub>10</sub> H <sub>11</sub> <sup>+</sup>              | 0.03  | C <sub>4</sub> H <sup>+</sup>                             | 0.03         | C <sub>6</sub> H <sub>13</sub> <sup>+</sup>                | 0.01  | C <sub>2</sub> H <sub>3</sub> O <sup>-</sup>              | 0.08  | <b>C<sub>4</sub>H<sub>5</sub><sup>+</sup></b>  | <b>-0.54</b> |
| C <sub>10</sub> H <sub>11</sub> O <sup>+</sup>            | 0.10  | C <sub>4</sub> H <sup>-</sup>                             | 0.19         | C <sub>6</sub> H <sub>5</sub> <sup>+</sup>                 | 0.04  | C <sub>2</sub> H <sub>4</sub> <sup>+</sup>                | -0.33 | C <sub>5</sub> H <sub>7</sub> <sup>+</sup>     | -0.48        |
| C <sub>10</sub> H <sub>14</sub> <sup>+</sup>              | 0.29  | <b>C<sub>4</sub>H<sub>6</sub><sup>+</sup></b>             | <b>-0.50</b> | C <sub>6</sub> H <sub>6</sub> O <sup>+</sup>               | 0.10  | C <sub>2</sub> H <sub>5</sub> O <sub>4</sub> <sup>+</sup> | 0.35  | C <sub>5</sub> H <sub>9</sub> <sup>+</sup>     | -0.44        |
| C <sub>12</sub> H <sub>15</sub> <sup>+</sup>              | -0.16 | C <sub>4</sub> H <sub>6</sub> O <sup>+</sup>              | -0.31        | C <sub>7</sub> H <sub>13</sub> <sup>+</sup>                | -0.06 | C <sub>3</sub> HO <sup>+</sup>                            | 0.11  | C <sub>6</sub> H <sub>5</sub> O <sup>-</sup>   | 0.20         |
| C <sub>2</sub> H <sup>+</sup>                             | -0.10 | C <sub>4</sub> H <sub>7</sub> O <sub>2</sub> <sup>+</sup> | 0.39         | C <sub>7</sub> H <sub>5</sub> O <sup>+</sup>               | 0.00  | C <sub>3</sub> H <sub>3</sub> <sup>+</sup>                | -0.17 | <b>WCA</b>                                     | <b>-0.51</b> |
| C <sub>2</sub> HO <sup>-</sup>                            | 0.30  | C <sub>4</sub> H <sub>8</sub> <sup>+</sup>                | -0.37        | C <sub>7</sub> H <sub>6</sub> O <sup>+</sup>               | 0.01  | C <sub>3</sub> H <sub>3</sub> O <sup>+</sup>              | -0.11 |                                                |              |
| C <sub>2</sub> H <sub>2</sub> O <sub>2</sub> <sup>-</sup> | 0.08  | C <sub>4</sub> H <sub>8</sub> O <sup>+</sup>              | 0.25         | C <sub>8</sub> H <sub>12</sub> <sup>+</sup>                | -0.05 | C <sub>3</sub> H <sub>3</sub> O <sub>2</sub> <sup>-</sup> | 0.07  |                                                |              |
| C <sub>2</sub> H <sub>3</sub> <sup>-</sup>                | -0.43 | C <sub>4</sub> H <sub>9</sub> O <sup>+</sup>              | 0.01         | C <sub>8</sub> H <sub>9</sub> O <sup>+</sup>               | 0.05  | C <sub>3</sub> H <sub>7</sub> <sup>+</sup>                | -0.12 |                                                |              |
| C <sub>2</sub> H <sub>5</sub> <sup>+</sup>                | -0.22 | C <sub>5</sub> H <sub>10</sub> <sup>+</sup>               | -0.24        | C <sub>9</sub> H <sub>11</sub> O <sub>2</sub> <sup>+</sup> | -0.08 | C <sub>3</sub> H <sub>7</sub> O <sub>2</sub> <sup>+</sup> | 0.29  |                                                |              |
| C <sub>2</sub> H <sub>5</sub> O <sup>+</sup>              | 0.21  | C <sub>5</sub> H <sub>12</sub> N <sup>+</sup>             | 0.08         | C <sub>9</sub> H <sub>13</sub> <sup>+</sup>                | -0.07 | C <sub>4</sub> H <sub>6</sub> O <sup>+</sup>              | -0.15 |                                                |              |
| C <sub>2</sub> H <sub>5</sub> O <sub>4</sub> <sup>+</sup> | 0.32  | C <sub>5</sub> H <sub>12</sub> NO <sup>+</sup>            | 0.19         | C <sub>9</sub> H <sub>15</sub> <sup>+</sup>                | -0.04 | C <sub>4</sub> H <sub>6</sub> O <sub>2</sub> <sup>+</sup> | -0.10 |                                                |              |
| C <sub>3</sub> H <sup>-</sup>                             | 0.26  | C <sub>5</sub> H <sub>2</sub> <sup>+</sup>                | 0.03         | F <sup>-</sup>                                             | 0.01  | C <sub>4</sub> H <sub>7</sub> <sup>+</sup>                | -0.32 |                                                |              |

| PA          |       |             |       | SA     |       | UPEC        |      |
|-------------|-------|-------------|-------|--------|-------|-------------|------|
| $C_3H_3^+$  | -0.43 | $C_5H_3^+$  | 0.01  | $OF^-$ | 0.31  | $C_5H_6O^+$ | 0.08 |
| $C_3H_3O^+$ | -0.30 | $C_5H_5O^+$ | -0.34 | WCA    | -0.39 | $C_6H_2^+$  | 0.25 |

**Table S6** Composition and pathogen attachment (expressed as log mCherry fluorescence, logF) of the smaller polymer library used for model validation

| <i>Polymer number</i><br>(Figure S6) | <i>Monomer 1</i> | <i>% monomer 1</i> | <i>% TBCHA</i><br>(Figure S6) | <i>Measured F</i><br><i>mCherry</i> | <i>log measured F</i><br><i>mCherry</i> |
|--------------------------------------|------------------|--------------------|-------------------------------|-------------------------------------|-----------------------------------------|
| <i>P1</i>                            | DdMA             | 100                | 0                             | 730                                 | 2.86                                    |
| <i>P2</i>                            | LMA              | 100                | 0                             | 259                                 | 2.41                                    |
| <i>P3</i>                            | CyDMA            | 100                | 0                             | 735                                 | 2.87                                    |
| <i>P4</i>                            | GMA              | 100                | 0                             | 854                                 | 2.93                                    |
| <i>P5</i>                            | LMMA             | 100                | 0                             | 848                                 | 2.93                                    |
| <i>P6</i>                            | EGPhEA           | 100                | 0                             | 1251                                | 3.10                                    |
| <i>P7</i>                            | CHMA             | 100                | 0                             | 411                                 | 2.61                                    |
| <i>P8</i>                            | PhMA             | 100                | 0                             | 1675                                | 3.22                                    |
| <i>P9</i>                            | HPhOPA           | 100                | 0                             | 2669                                | 3.43                                    |
| <i>P10</i>                           | DdMA             | 83.3               | 16.6                          | 623                                 | 2.79                                    |
| <i>P11</i>                           | LMA              | 83.3               | 16.6                          | 273                                 | 2.44                                    |
| <i>P12</i>                           | CyDMA            | 83.3               | 16.6                          | 643                                 | 2.81                                    |
| <i>P13</i>                           | GMA              | 83.3               | 16.6                          | 901                                 | 2.95                                    |
| <i>P14</i>                           | LMMA             | 83.3               | 16.6                          | 673                                 | 2.83                                    |
| <i>P15</i>                           | EGPhEA           | 83.3               | 16.6                          | 448                                 | 2.65                                    |
| <i>P16</i>                           | CHMA             | 83.3               | 16.6                          | 694.0                               | 2.84                                    |
| <i>P17</i>                           | PhMA             | 83.3               | 16.6                          | 1557                                | 3.19                                    |
| <i>P18</i>                           | HPhOPA           | 83.3               | 16.6                          | 2788                                | 3.45                                    |
| <i>P19</i>                           | DdMA             | 66.6               | 33.3                          | 682                                 | 2.83                                    |
| <i>P20</i>                           | LMA              | 66.6               | 33.3                          | 439                                 | 2.64                                    |
| <i>P21</i>                           | CyDMA            | 66.6               | 33.3                          | 816                                 | 2.91                                    |
| <i>P22</i>                           | GMA              | 66.6               | 33.3                          | 887                                 | 2.95                                    |
| <i>P23</i>                           | LMMA             | 66.6               | 33.3                          | 405                                 | 2.61                                    |
| <i>P24</i>                           | EGPhEA           | 66.6               | 33.3                          | 423                                 | 2.63                                    |
| <i>P25</i>                           | CHMA             | 66.6               | 33.3                          | 725                                 | 2.86                                    |

| <i>Polymer number</i><br>(Figure S6) | <i>Monomer 1</i> | <i>% monomer 1</i> | <i>% TBCHA</i><br>(Figure S6) | <i>Measured F</i><br><i>mCherry</i> | <i>log measured F</i><br><i>mCherry</i> |
|--------------------------------------|------------------|--------------------|-------------------------------|-------------------------------------|-----------------------------------------|
| <i>P26</i>                           | PhMA             | 66.6               | 33.3                          | 1355                                | 3.13                                    |
| <i>P27</i>                           | HPhOPA           | 66.6               | 33.3                          | 2118                                | 3.33                                    |
| <i>P28</i>                           | DdMA             | 50                 | 50                            | 570                                 | 2.76                                    |
| <i>P29</i>                           | LMA              | 50                 | 50                            | 442                                 | 2.65                                    |
| <i>P30</i>                           | CyDMA            | 50                 | 50                            | 668                                 | 2.83                                    |
| <i>P31</i>                           | GMA              | 50                 | 50                            | 694                                 | 2.84                                    |
| <i>P32</i>                           | LMMA             | 50                 | 50                            | 688                                 | 2.84                                    |
| <i>P33</i>                           | EGPhEA           | 50                 | 50                            | 550                                 | 2.74                                    |
| <i>P34</i>                           | CHMA             | 50                 | 50                            | 675                                 | 2.83                                    |
| <i>P35</i>                           | PhMA             | 50                 | 50                            | 895                                 | 2.95                                    |
| <i>P36</i>                           | HPhOPA           | 50                 | 50                            | 1280                                | 3.11                                    |
| <i>P37</i>                           | DdMA             | 33.3               | 66.6                          | 1023                                | 3.01                                    |
| <i>P38</i>                           | LMA              | 33.3               | 66.6                          | na                                  |                                         |
| <i>P39</i>                           | CyDMA            | 33.3               | 66.6                          | na                                  |                                         |
| <i>P40</i>                           | GMA              | 33.3               | 66.6                          | 354                                 | 2.55                                    |
| <i>P41</i>                           | LMMA             | 33.3               | 66.6                          | 450                                 | 2.65                                    |
| <i>P42</i>                           | EGPhEA           | 33.3               | 66.6                          | 656                                 | 2.82                                    |
| <i>P43</i>                           | CHMA             | 33.3               | 66.6                          | 591                                 | 2.77                                    |
| <i>P44</i>                           | PhMA             | 33.3               | 66.6                          | 732                                 | 2.86                                    |
| <i>P45</i>                           | HPhOPA           | 33.3               | 66.6                          | 1017                                | 3.01                                    |
| <i>P46</i>                           | DdMA             | 16.7               | 83.3                          | 893                                 | 2.95                                    |
| <i>P47</i>                           | LMA              | 16.7               | 83.3                          | 642                                 | 2.81                                    |
| <i>P48</i>                           | CyDMA            | 16.7               | 83.3                          | 326                                 | 2.51                                    |
| <i>P49</i>                           | GMA              | 16.7               | 83.3                          | 720                                 | 2.86                                    |
| <i>P50</i>                           | LMMA             | 16.7               | 83.3                          | 190                                 | 2.28                                    |
| <i>P51</i>                           | EGPhEA           | 16.7               | 83.3                          | 530                                 | 2.72                                    |
| <i>P52</i>                           | CHMA             | 16.7               | 83.3                          | 298                                 | 2.47                                    |
| <i>P53</i>                           | PhMA             | 16.7               | 83.3                          | 614                                 | 2.79                                    |



| <i>Polymer number</i><br>(Figure S6) | <i>Monomer 1</i> | <i>% monomer 1</i> | <i>% TBCHA</i><br>(Figure S6) | <i>Measured F</i><br><i>mCherry</i> | <i>log measured F</i><br><i>mCherry</i> |
|--------------------------------------|------------------|--------------------|-------------------------------|-------------------------------------|-----------------------------------------|
| <i>P54</i>                           | HPhOPA           | 16.7               | 83.3                          | 826                                 | 2.92                                    |
| <i>P55</i>                           | tBCHA            | 100                | 0                             | 693                                 | 2.84                                    |
| <i>P56</i>                           | NpMAe            | 100                | 0                             | 855                                 | 2.93                                    |
| <i>P57</i>                           | BMA              | 100                | 0                             | 1075                                | 3.03                                    |
| <i>P58</i>                           | NpMAe            | 50                 | 50                            | 742                                 | 2.87                                    |
| <i>P59</i>                           | BnMA             | 50                 | 50                            | 967                                 | 2.99                                    |
| <i>P60</i>                           | MEdMSPNH         | 100                | 0                             | 457                                 | 2.66                                    |
| <i>P61</i>                           | MEdMSPNH         | 50                 | 50                            | 445                                 | 2.65                                    |

**Table S7** Composition and pathogen attachment (expressed as log mCherry fluorescence, logF) of the larger polymer library used for model validation

| <i>Monomer 1</i><br>( <i>Figure S7</i> ) | <i>% monomer 1</i> | <i>Monomer 2</i><br>( <i>Figure S7</i> ) | <i>% monomer 2</i> | <i>Measured F</i><br><i>mCherry</i> | <i>log measured F</i><br><i>mCherry</i> |
|------------------------------------------|--------------------|------------------------------------------|--------------------|-------------------------------------|-----------------------------------------|
| <i>CHMA</i>                              | 67                 | Cddm                                     | 33                 | 188                                 | 2.27                                    |
| <i>tBCHA</i>                             | 67                 | LMM                                      | 33                 | 331                                 | 2.52                                    |
| <i>EGDPEA</i>                            | 67                 | 4MpM                                     | 33                 | 430                                 | 2.63                                    |
| <i>CiM</i>                               | 67                 | 4MbM                                     | 33                 | 395                                 | 2.60                                    |
| <i>4IpbM</i>                             | 67                 | EGDPEA                                   | 33                 | 349                                 | 2.54                                    |
| <i>4NbM</i>                              | 67                 | Cddm                                     | 33                 | 1196                                | 3.08                                    |
| <i>CM</i>                                | 67                 | LMM                                      | 33                 | 505                                 | 2.70                                    |
| <i>4MpM</i>                              | 67                 | 4MpM                                     | 33                 | 631                                 | 2.80                                    |
| <i>PM</i>                                | 67                 | 4MbM                                     | 33                 | 452                                 | 2.65                                    |
| <i>2EhM</i>                              | 67                 | EGDPEA                                   | 33                 | 315                                 | 2.50                                    |
| <i>GM</i>                                | 67                 | Cddm                                     | 33                 | 511                                 | 2.71                                    |
| <i>DdMA</i>                              | 67                 | LMM                                      | 33                 | 551                                 | 2.74                                    |
| <i>Cddm</i>                              | 67                 | 4MpM                                     | 33                 | 427                                 | 2.63                                    |
| <i>4MbM</i>                              | 100                |                                          |                    | 318                                 | 2.50                                    |
| <i>MEdMSPNH</i>                          | 100                |                                          |                    | 493                                 | 2.69                                    |
| <i>4MpM</i>                              | 25                 | HPhOPA                                   | 75                 | 2059                                | 3.31                                    |
| <i>4MbM</i>                              | 25                 | PhMA                                     | 75                 | 629                                 | 2.80                                    |
| <i>EGDPEA</i>                            | 25                 | DEGMA                                    | 75                 | 717                                 | 2.86                                    |
| <i>Cddm</i>                              | 25                 | MEdMSPNH                                 | 75                 | 799                                 | 2.90                                    |
| <i>LMM</i>                               | 50                 | HPhOPA                                   | 50                 | 495                                 | 2.69                                    |
| <i>4MpM</i>                              | 50                 | PhMA                                     | 50                 | 912                                 | 2.96                                    |
| <i>4MbM</i>                              | 50                 | DEGMA                                    | 50                 | 588                                 | 2.77                                    |
| <i>CHMA</i>                              | 67                 | LMM                                      | 33                 | 262                                 | 2.42                                    |
| <i>tBCHA</i>                             | 67                 | 4MpM                                     | 33                 | 491                                 | 2.69                                    |
| <i>EGDPEA</i>                            | 67                 | 64MbM                                    | 33                 | 447                                 | 2.65                                    |

| <i>Monomer 1</i><br>( <i>Figure S7</i> ) | <i>% monomer 1</i> | <i>Monomer 2</i><br>( <i>Figure S7</i> ) | <i>% monomer 2</i> | <i>Measured F</i><br><i>mCherry</i> | <i>log measured F</i><br><i>mCherry</i> |
|------------------------------------------|--------------------|------------------------------------------|--------------------|-------------------------------------|-----------------------------------------|
| <i>CiM</i>                               | 67                 | EGDPEA                                   | 33                 | 336                                 | 2.53                                    |
| <i>4MbM</i>                              | 67                 | Cddm                                     | 33                 | 503                                 | 2.70                                    |
| <i>4NbM</i>                              | 67                 | LMM                                      | 33                 | 1279                                | 3.11                                    |
| <i>CM</i>                                | 67                 | 4MpM                                     | 33                 | 400                                 | 2.60                                    |
| <i>4MpM</i>                              | 67                 | 4MbM                                     | 33                 | 381                                 | 2.58                                    |
| <i>PM</i>                                | 67                 | EGDPEA                                   | 33                 | 360                                 | 2.56                                    |
| <i>LMM</i>                               | 67                 | Cddm                                     | 33                 | 390                                 | 2.59                                    |
| <i>GM</i>                                | 67                 | LMM                                      | 33                 | 390                                 | 2.59                                    |
| <i>DdMA</i>                              | 67                 | 4MpM                                     | 33                 | 605                                 | 2.78                                    |
| <i>Cddm</i>                              | 67                 | 4MbM                                     | 33                 | 407                                 | 2.61                                    |
| <i>Cddm</i>                              | 100                |                                          |                    | 378                                 | 2.58                                    |
| <i>BnMA</i>                              | 100                |                                          |                    | 161                                 | 2.21                                    |
| <i>4MbM</i>                              | 25                 | HPhOPA                                   | 75                 | 847                                 | 2.93                                    |
| <i>EGDPEA</i>                            | 25                 | PhMA                                     | 75                 | 680                                 | 2.83                                    |
| <i>Cddm</i>                              | 25                 | BnMA                                     | 75                 | 453                                 | 2.66                                    |
| <i>LMM</i>                               | 25                 | MEdMSPNH                                 | 75                 | 459                                 | 2.66                                    |
| <i>4MpM</i>                              | 50                 | HPhOPA                                   | 50                 | 1682                                | 3.23                                    |
| <i>4MbM</i>                              | 50                 | PhMA                                     | 50                 | 720                                 | 2.86                                    |
| <i>EGDPEA</i>                            | 50                 | DEGMA                                    | 50                 | 698                                 | 2.84                                    |
| <i>CHMA</i>                              | 67                 | 4MpM                                     | 33                 | 185                                 | 2.27                                    |
| <i>tBCHA</i>                             | 67                 | 4MbM                                     | 33                 | 470                                 | 2.67                                    |
| <i>EGDPEA</i>                            | 67                 | EGDPEA                                   | 33                 | 447                                 | 2.65                                    |
| <i>4lpbM</i>                             | 67                 | Cddm                                     | 33                 | 343                                 | 2.53                                    |
| <i>4MbM</i>                              | 67                 | LMM                                      | 33                 | 378                                 | 2.58                                    |
| <i>4NbM</i>                              | 67                 | 4MpM                                     | 33                 | 617                                 | 2.79                                    |
| <i>CM</i>                                | 67                 | 4MbM                                     | 33                 | 431                                 | 2.63                                    |
| <i>4MpM</i>                              | 67                 | EGDPEA                                   | 33                 | 391                                 | 2.59                                    |
| <i>2EhM</i>                              | 67                 | 6Cddm                                    | 33                 | 321                                 | 2.51                                    |

| <i>Monomer 1</i><br>(Figure S7) | <i>% monomer 1</i> | <i>Monomer 2</i><br>(Figure S7) | <i>% monomer 2</i> | <i>Measured F</i><br><i>mCherry</i> | <i>log measured F</i><br><i>mCherry</i> |
|---------------------------------|--------------------|---------------------------------|--------------------|-------------------------------------|-----------------------------------------|
| <i>LMM</i>                      | 67                 | <i>LMM</i>                      | 33                 | 299                                 | 2.47                                    |
| <i>GM</i>                       | 67                 | <i>4MpM</i>                     | 33                 | 579                                 | 2.76                                    |
| <i>DdMA</i>                     | 67                 | <i>4MbM</i>                     | 33                 | 417                                 | 2.62                                    |
| <i>Cddm</i>                     | 67                 | <i>EGDPEA</i>                   | 33                 | 357                                 | 2.55                                    |
| <i>LMM</i>                      | 100                |                                 |                    | 333                                 | 2.52                                    |
| <i>EGDPEA</i>                   | 25                 | <i>HPhOPA</i>                   | 75                 | 889                                 | 2.95                                    |
| <i>Cddm</i>                     | 25                 | <i>DEGMA</i>                    | 75                 | 397                                 | 2.60                                    |
| <i>LMM</i>                      | 25                 | <i>BnMA</i>                     | 75                 | 562                                 | 2.75                                    |
| <i>4MpM</i>                     | 25                 | <i>MEdMSPNH</i>                 | 75                 | 699                                 | 2.84                                    |
| <i>4MbM</i>                     | 50                 | <i>HPhOPA</i>                   | 50                 | 568                                 | 2.75                                    |
| <i>EGDPEA</i>                   | 50                 | <i>PhMA</i>                     | 50                 | 463                                 | 2.67                                    |
| <i>Cddm</i>                     | 50                 | <i>BnMA</i>                     | 50                 | 594                                 | 2.77                                    |
| <i>CHMA</i>                     | 67                 | <i>4MbM</i>                     | 33                 | 338                                 | 2.53                                    |
| <i>tBCHA</i>                    | 67                 | <i>EGDPEA</i>                   | 33                 | 265                                 | 2.42                                    |
| <i>CiM</i>                      | 67                 | <i>Cddm</i>                     | 33                 | 336                                 | 2.53                                    |
| <i>4IpbM</i>                    | 67                 | <i>LMM</i>                      | 33                 | 339                                 | 2.53                                    |
| <i>4MbM</i>                     | 67                 | <i>4MpM</i>                     | 33                 | 346                                 | 2.54                                    |
| <i>4NbM</i>                     | 67                 | <i>4MbM</i>                     | 33                 | 360                                 | 2.56                                    |
| <i>CM</i>                       | 67                 | <i>EGDPEA</i>                   | 33                 | 431                                 | 2.63                                    |
| <i>PM</i>                       | 67                 | <i>Cddm</i>                     | 33                 | 355                                 | 2.55                                    |
| <i>2EhM</i>                     | 67                 | <i>LMM</i>                      | 33                 | 381                                 | 2.58                                    |
| <i>LMM</i>                      | 67                 | <i>4MpM</i>                     | 33                 | 359                                 | 2.55                                    |
| <i>GM</i>                       | 67                 | <i>4MbM</i>                     | 33                 | 453                                 | 2.66                                    |
| <i>DdMA</i>                     | 67                 | <i>EGDPEA</i>                   | 33                 | 392                                 | 2.59                                    |
| <i>4MpM</i>                     | 100                |                                 |                    | 528                                 | 2.72                                    |
| <i>EGDPEA</i>                   | 75                 | <i>MEdMSPNH</i>                 | 25                 | 592                                 | 2.77                                    |
| <i>Cddm</i>                     | 25                 | <i>PhMA</i>                     | 75                 | 518                                 | 2.71                                    |
| <i>LMM</i>                      | 25                 | <i>DEGMA</i>                    | 75                 | 667                                 | 2.82                                    |

| <i>Monomer 1</i><br>( <i>Figure S7</i> ) | <i>% monomer 1</i> | <i>Monomer 2</i><br>( <i>Figure S7</i> ) | <i>% monomer 2</i> | <i>Measured F</i><br><i>mCherry</i> | <i>log measured F</i><br><i>mCherry</i> |
|------------------------------------------|--------------------|------------------------------------------|--------------------|-------------------------------------|-----------------------------------------|
| <i>4MpM</i>                              | 25                 | BnMA                                     | 75                 | 521                                 | 2.72                                    |
| <i>4MbM</i>                              | 25                 | MEdMSPNH                                 | 75                 | 1143                                | 3.06                                    |
| <i>EGDPEA</i>                            | 50                 | HPhOPA                                   | 50                 | 426                                 | 2.63                                    |
| <i>Cddm</i>                              | 50                 | DEGMA                                    | 50                 | 468                                 | 2.67                                    |
| <i>LMM</i>                               | 50                 | BnMA                                     | 50                 | 762                                 | 2.88                                    |
| <i>CHMA</i>                              | 67                 | EGDPEA                                   | 33                 | 255                                 | 2.41                                    |
| <i>EGDPEA</i>                            | 67                 | Cddm                                     | 33                 | 320                                 | 2.51                                    |
| <i>CiM</i>                               | 67                 | LMM                                      | 33                 | 305                                 | 2.48                                    |
| <i>4IpbM</i>                             | 67                 | 4MpM                                     | 33                 | 307                                 | 2.49                                    |
| <i>4MbM</i>                              | 67                 | 4MbM                                     | 33                 | 503                                 | 2.70                                    |
| <i>4NbM</i>                              | 67                 | EGDPEA                                   | 33                 | 442                                 | 2.65                                    |
| <i>4MpM</i>                              | 67                 | Cddm                                     | 33                 | 545                                 | 2.74                                    |
| <i>PM</i>                                | 67                 | LMM                                      | 33                 | 379                                 | 2.58                                    |
| <i>2EhM</i>                              | 67                 | 4MpM                                     | 33                 | 430                                 | 2.63                                    |
| <i>LMM</i>                               | 67                 | 4MbM                                     | 33                 | 358                                 | 2.55                                    |
| <i>GM</i>                                | 67                 | EGDPEA                                   | 33                 | 318                                 | 2.50                                    |
| <i>Cddm</i>                              | 67                 | Cddm                                     | 33                 | 505                                 | 2.70                                    |
| <i>PhMA</i>                              | 100                |                                          |                    | 626                                 | 2.80                                    |
| <i>Cddm</i>                              | 25                 | HPhOPA                                   | 75                 | 379                                 | 2.58                                    |
| <i>LMM</i>                               | 25                 | PhMA                                     | 75                 | 731                                 | 2.86                                    |
| <i>4MpM</i>                              | 25                 | DEGMA                                    | 75                 | 618                                 | 2.79                                    |
| <i>4MbM</i>                              | 25                 | BnMA                                     | 75                 | 460                                 | 2.66                                    |
| <i>EGDPEA</i>                            | 25                 | MEdMSPNH                                 | 75                 | 927                                 | 2.97                                    |
| <i>Cddm</i>                              | 50                 | PhMA                                     | 50                 | 610                                 | 2.78                                    |
| <i>LMM</i>                               | 50                 | DEGMA                                    | 50                 | 545                                 | 2.74                                    |
| <i>4MpM</i>                              | 50                 | BnMA                                     | 50                 | 586                                 | 2.77                                    |
| <i>tBCHA</i>                             | 67                 | Cddm                                     | 33                 | 293                                 | 2.47                                    |
| <i>EGDPEA</i>                            | 67                 | LMM                                      | 33                 | 332                                 | 2.52                                    |

| <i>Monomer 1</i><br>( <i>Figure S7</i> ) | <i>% monomer 1</i> | <i>Monomer 2</i><br>( <i>Figure S7</i> ) | <i>% monomer 2</i> | <i>Measured F</i><br><i>mCherry</i> | <i>log measured F</i><br><i>mCherry</i> |
|------------------------------------------|--------------------|------------------------------------------|--------------------|-------------------------------------|-----------------------------------------|
| <i>CiM</i>                               | 67                 | 4MpM                                     | 33                 | 348                                 | 2.54                                    |
| <i>4IpbM</i>                             | 67                 | 4MbM                                     | 33                 | 330                                 | 2.52                                    |
| <i>4MbM</i>                              | 67                 | EGDPEA                                   | 33                 | 336                                 | 2.53                                    |
| <i>CM</i>                                | 67                 | Cddm                                     | 33                 | 461                                 | 2.66                                    |
| <i>4MpM</i>                              | 67                 | LMM                                      | 33                 | 436                                 | 2.64                                    |
| <i>PM</i>                                | 67                 | 4MpM                                     | 33                 | 326                                 | 2.51                                    |
| <i>2EhM</i>                              | 67                 | 4MbM                                     | 33                 | 395                                 | 2.60                                    |
| <i>LMM</i>                               | 67                 | EGDPEA                                   | 33                 | 341                                 | 2.53                                    |
| <i>DdMA</i>                              | 67                 | Cddm                                     | 33                 | 548                                 | 2.74                                    |
| <i>Cddm</i>                              | 67                 | LMM                                      | 33                 | 381                                 | 2.58                                    |
| <i>LMM</i>                               | 25                 | HPhOPA                                   | 75                 | 677                                 | 2.83                                    |
| <i>4MpM</i>                              | 25                 | PhMA                                     | 75                 | 665                                 | 2.82                                    |
| <i>4MbM</i>                              | 25                 | DEGMA                                    | 75                 | 670                                 | 2.83                                    |
| <i>EGDPEA</i>                            | 25                 | BnMA                                     | 75                 | 249                                 | 2.40                                    |
| <i>Cddm</i>                              | 50                 | HPhOPA                                   | 50                 | 748                                 | 2.87                                    |
| <i>LMM</i>                               | 50                 | PhMA                                     | 50                 | 739                                 | 2.87                                    |
| <i>4MpM</i>                              | 50                 | DEGMA                                    | 50                 | 628                                 | 2.80                                    |
| <i>4MbM</i>                              | 50                 | BnMA                                     | 50                 | 167                                 | 2.22                                    |
| <i>CHMA</i>                              | 67                 | DdMA                                     | 33                 | 186                                 | 2.27                                    |
| <i>tBCHA</i>                             | 67                 | 2EhM                                     | 33                 | 401                                 | 2.60                                    |
| <i>EGDPEA</i>                            | 67                 | CM                                       | 33                 | 412                                 | 2.61                                    |
| <i>CiM</i>                               | 67                 | 4IpbM                                    | 33                 | 357                                 | 2.55                                    |
| <i>4IpbM</i>                             | 67                 | tBCHA                                    | 33                 | 372                                 | 2.57                                    |
| <i>CM</i>                                | 67                 | 2EhM                                     | 33                 | 582                                 | 2.76                                    |
| <i>4MpM</i>                              | 67                 | CM                                       | 33                 | 692                                 | 2.84                                    |
| <i>PM</i>                                | 67                 | 4IpbM                                    | 33                 | 593                                 | 2.77                                    |
| <i>2EhM</i>                              | 67                 | 6tBCHA                                   | 33                 | 400                                 | 2.60                                    |
| <i>GM</i>                                | 67                 | DdMA                                     | 33                 | 373                                 | 2.57                                    |

| <i>Monomer 1</i><br>( <i>Figure S7</i> ) | <i>% monomer 1</i> | <i>Monomer 2</i><br>( <i>Figure S7</i> ) | <i>% monomer 2</i> | <i>Measured F</i><br><i>mCherry</i> | <i>log measured F</i><br><i>mCherry</i> |
|------------------------------------------|--------------------|------------------------------------------|--------------------|-------------------------------------|-----------------------------------------|
| <i>DdMA</i>                              | 67                 | 2EhM                                     | 33                 | 496                                 | 2.70                                    |
| <i>Cddm</i>                              | 67                 | CM                                       | 33                 | 464                                 | 2.67                                    |
| <i>4IpbM</i>                             | 100                |                                          |                    | 270                                 | 2.43                                    |
| <i>tBCHA</i>                             | 100                |                                          |                    | 313                                 | 2.50                                    |
| <i>DEGMA</i>                             | 100                |                                          |                    | 483                                 | 2.68                                    |
| <i>CM</i>                                | 25                 | HPhOPA                                   | 75                 | 1688                                | 3.23                                    |
| <i>4IpbM</i>                             | 25                 | PhMA                                     | 75                 | 537                                 | 2.73                                    |
| <i>tBCHA</i>                             | 25                 | DEGMA                                    | 75                 | 679                                 | 2.83                                    |
| <i>DdMA</i>                              | 25                 | MEdMSPNH                                 | 75                 | 804                                 | 2.91                                    |
| <i>2EhM</i>                              | 50                 | HPhOPA                                   | 50                 | 494                                 | 2.69                                    |
| <i>CM</i>                                | 50                 | PhMA                                     | 50                 | 574                                 | 2.76                                    |
| <i>4IpbM</i>                             | 50                 | DEGMA                                    | 50                 | 496                                 | 2.70                                    |
| <i>CHMA</i>                              | 67                 | 2EhM                                     | 33                 | 291                                 | 2.46                                    |
| <i>tBCHA</i>                             | 67                 | CM                                       | 33                 | 708                                 | 2.85                                    |
| <i>EGDPEA</i>                            | 67                 | 4IpbM                                    | 33                 | 302                                 | 2.48                                    |
| <i>CiM</i>                               | 67                 | tBCHA                                    | 33                 | 401                                 | 2.60                                    |
| <i>4MbM</i>                              | 67                 | DdMA                                     | 33                 | 482                                 | 2.68                                    |
| <i>4NbM</i>                              | 67                 | 2EhM                                     | 33                 | 1697                                | 3.23                                    |
| <i>CM</i>                                | 67                 | CM                                       | 33                 | 874                                 | 2.94                                    |
| <i>4MpM</i>                              | 67                 | 4IpbM                                    | 33                 | 365                                 | 2.56                                    |
| <i>PM</i>                                | 67                 | tBCHA                                    | 33                 | 615                                 | 2.79                                    |
| <i>LMM</i>                               | 67                 | DdMA                                     | 33                 | 340                                 | 2.53                                    |
| <i>GM</i>                                | 67                 | 2EhM                                     | 33                 | 410                                 | 2.61                                    |
| <i>DdMA</i>                              | 67                 | CM                                       | 33                 | 523                                 | 2.72                                    |
| <i>Cddm</i>                              | 67                 | 4IpbM                                    | 33                 | 398                                 | 2.60                                    |
| <i>DdMA</i>                              | 100                |                                          |                    | 333                                 | 2.52                                    |
| <i>4IpbM</i>                             | 25                 | HPhOPA                                   | 75                 | 634                                 | 2.80                                    |
| <i>tBCHA</i>                             | 25                 | PhMA                                     | 75                 | 561                                 | 2.75                                    |

| <i>Monomer 1</i><br>(Figure S7) | <i>% monomer 1</i> | <i>Monomer 2</i><br>(Figure S7) | <i>% monomer 2</i> | <i>Measured F</i><br><i>mCherry</i> | <i>log measured F</i><br><i>mCherry</i> |
|---------------------------------|--------------------|---------------------------------|--------------------|-------------------------------------|-----------------------------------------|
| <i>DdMA</i>                     | 25                 | BnMA                            | 75                 | 676                                 | 2.83                                    |
| <i>2EhM</i>                     | 25                 | MEdMSPNH                        | 75                 | 724                                 | 2.86                                    |
| <i>CM</i>                       | 50                 | HPhOPA                          | 50                 | 1022                                | 3.01                                    |
| <i>4IpbM</i>                    | 50                 | PhMA                            | 50                 | 357                                 | 2.55                                    |
| <i>tBCHA</i>                    | 50                 | DEGMA                           | 50                 | 471                                 | 2.67                                    |
| <i>CHMA</i>                     | 67                 | 33CM                            | 33                 | 341                                 | 2.53                                    |
| <i>tBCHA</i>                    | 67                 | 4IpbM                           | 33                 | 374                                 | 2.57                                    |
| <i>EGDPEA</i>                   | 67                 | tBCHA                           | 33                 | 328                                 | 2.52                                    |
| <i>4IpbM</i>                    | 67                 | DdMA                            | 33                 | 437                                 | 2.64                                    |
| <i>4MbM</i>                     | 67                 | 2EhM                            | 33                 | 379                                 | 2.58                                    |
| <i>4NbM</i>                     | 67                 | CM                              | 33                 | 2274                                | 3.36                                    |
| <i>CM</i>                       | 67                 | 4IpbM                           | 33                 | 346                                 | 2.54                                    |
| <i>4MpM</i>                     | 67                 | tBCHA                           | 33                 | 473                                 | 2.67                                    |
| <i>2EhM</i>                     | 67                 | DdMA                            | 33                 | 571                                 | 2.76                                    |
| <i>LMM</i>                      | 67                 | 2EhM                            | 33                 | 372                                 | 2.57                                    |
| <i>GM</i>                       | 67                 | CM                              | 33                 | 424                                 | 2.63                                    |
| <i>DdMA</i>                     | 67                 | 4IpbM                           | 33                 | 397                                 | 2.60                                    |
| <i>Cddm</i>                     | 67                 | tBCHA                           | 33                 | 389                                 | 2.59                                    |
| <i>2EhM</i>                     | 100                |                                 |                    | 347                                 | 2.54                                    |
| <i>tBCHA</i>                    | 25                 | HPhOPA                          | 75                 | 773                                 | 2.89                                    |
| <i>DdMA</i>                     | 25                 | DEGMA                           | 75                 | 477                                 | 2.68                                    |
| <i>2EhM</i>                     | 25                 | BnMA                            | 75                 | 405                                 | 2.61                                    |
| <i>CM</i>                       | 25                 | MEdMSPNH                        | 75                 | 937                                 | 2.97                                    |
| <i>4IpbM</i>                    | 50                 | HPhOPA                          | 50                 | 535                                 | 2.73                                    |
| <i>tBCHA</i>                    | 50                 | PhMA                            | 50                 | 442                                 | 2.64                                    |
| <i>DdMA</i>                     | 50                 | 5BnMA                           | 50                 | 528                                 | 2.72                                    |
| <i>CHMA</i>                     | 67                 | 4IpbM                           | 33                 | 287                                 | 2.46                                    |
| <i>tBCHA</i>                    | 67                 | tBCHA                           | 33                 | 386                                 | 2.59                                    |



| <i>Monomer 1</i><br>( <i>Figure S7</i> ) | <i>% monomer 1</i> | <i>Monomer 2</i><br>( <i>Figure S7</i> ) | <i>% monomer 2</i> | <i>Measured F</i><br><i>mCherry</i> | <i>log measured F</i><br><i>mCherry</i> |
|------------------------------------------|--------------------|------------------------------------------|--------------------|-------------------------------------|-----------------------------------------|
| <i>CiM</i>                               | 67                 | DdMA                                     | 33                 | 491                                 | 2.69                                    |
| <i>4IpbM</i>                             | 67                 | 2EhM                                     | 33                 | 313                                 | 2.50                                    |
| <i>4MbM</i>                              | 67                 | CM                                       | 33                 | 405                                 | 2.61                                    |
| <i>CM</i>                                | 67                 | tBCHA                                    | 33                 | 421                                 | 2.62                                    |
| <i>PM</i>                                | 67                 | DdMA                                     | 33                 | 556                                 | 2.75                                    |
| <i>2EhM</i>                              | 67                 | 2EhM                                     | 33                 | 444                                 | 2.65                                    |
| <i>LMM</i>                               | 67                 | CM                                       | 33                 | 547                                 | 2.74                                    |
| <i>GM</i>                                | 67                 | 4IpbM                                    | 33                 | 380                                 | 2.58                                    |
| <i>DdMA</i>                              | 67                 | tBCHA                                    | 33                 | 400                                 | 2.60                                    |
| <i>CM</i>                                | 100                |                                          |                    | 426                                 | 2.63                                    |
| <i>tBCHA</i>                             | 75                 | MEdMSPNH                                 | 25                 | 710                                 | 2.85                                    |
| <i>DdMA</i>                              | 25                 | PhMA                                     | 75                 | 578                                 | 2.76                                    |
| <i>2EhM</i>                              | 25                 | DEGMA                                    | 75                 | 579                                 | 2.76                                    |
| <i>CM</i>                                | 25                 | BnMA                                     | 75                 | 473                                 | 2.67                                    |
| <i>4IpbM</i>                             | 25                 | MEdMSPNH                                 | 75                 | 952                                 | 2.98                                    |
| <i>tBCHA</i>                             | 50                 | HPhOPA                                   | 50                 | 546                                 | 2.74                                    |
| <i>DdMA</i>                              | 50                 | DEGMA                                    | 50                 | 474                                 | 2.68                                    |
| <i>2EhM</i>                              | 50                 | BnMA                                     | 50                 | 349                                 | 2.54                                    |
| <i>CHMA</i>                              | 67                 | tBCHA                                    | 33                 | 209                                 | 2.32                                    |
| <i>EGDPEA</i>                            | 67                 | DdMA                                     | 33                 | 401                                 | 2.60                                    |
| <i>CiM</i>                               | 67                 | 2EhM                                     | 33                 | 307                                 | 2.49                                    |
| <i>4IpbM</i>                             | 67                 | CM                                       | 33                 | 450                                 | 2.65                                    |
| <i>4MbM</i>                              | 67                 | 4IpbM                                    | 33                 | 327                                 | 2.51                                    |
| <i>4NbM</i>                              | 67                 | tBCHA                                    | 33                 | 1417                                | 3.15                                    |
| <i>4MpM</i>                              | 67                 | DdMA                                     | 33                 | 523                                 | 2.72                                    |
| <i>PM</i>                                | 67                 | 2EhM                                     | 33                 | 512                                 | 2.71                                    |
| <i>2EhM</i>                              | 67                 | 33CM                                     | 33                 | 489                                 | 2.69                                    |
| <i>LMM</i>                               | 67                 | 4IpbM                                    | 33                 | 477                                 | 2.68                                    |

| <i>Monomer 1</i><br>(Figure S7) | <i>% monomer 1</i> | <i>Monomer 2</i><br>(Figure S7) | <i>% monomer 2</i> | <i>Measured F</i><br><i>mCherry</i> | <i>log measured F</i><br><i>mCherry</i> |
|---------------------------------|--------------------|---------------------------------|--------------------|-------------------------------------|-----------------------------------------|
| <i>GM</i>                       | 67                 | tBCHA                           | 33                 | 404                                 | 2.61                                    |
| <i>Cddm</i>                     | 67                 | DdMA                            | 33                 | 477                                 | 2.68                                    |
| <i>DdMA</i>                     | 25                 | HPhOPA                          | 75                 | 1066                                | 3.03                                    |
| <i>2EhM</i>                     | 25                 | PhMA                            | 75                 | 538                                 | 2.73                                    |
| <i>CM</i>                       | 25                 | DEGMA                           | 75                 | 543                                 | 2.73                                    |
| <i>4IpbM</i>                    | 25                 | BnMA                            | 75                 | 564                                 | 2.75                                    |
| <i>tBCHA</i>                    | 25                 | MEdMSPNH                        | 75                 | 959                                 | 2.98                                    |
| <i>DdMA</i>                     | 50                 | PhMA                            | 50                 | 558                                 | 2.75                                    |
| <i>2EhM</i>                     | 50                 | DEGMA                           | 50                 | 457                                 | 2.66                                    |
| <i>CM</i>                       | 50                 | BnMA                            | 50                 | 510                                 | 2.71                                    |
| <i>tBCHA</i>                    | 67                 | DdMA                            | 33                 | 362                                 | 2.56                                    |
| <i>EGDPEA</i>                   | 67                 | 2EhM                            | 33                 | 293                                 | 2.47                                    |
| <i>CiM</i>                      | 67                 | CM                              | 33                 | 477                                 | 2.68                                    |
| <i>4IpbM</i>                    | 67                 | 4IpbM                           | 33                 | 362                                 | 2.56                                    |
| <i>4MbM</i>                     | 67                 | tBCHA                           | 33                 | 378                                 | 2.58                                    |
| <i>CM</i>                       | 67                 | DdMA                            | 33                 | 747                                 | 2.87                                    |
| <i>4MpM</i>                     | 67                 | 2EhM                            | 33                 | 492                                 | 2.69                                    |
| <i>PM</i>                       | 67                 | CM                              | 33                 | 439                                 | 2.64                                    |
| <i>2EhM</i>                     | 67                 | 4IpbM                           | 33                 | 400                                 | 2.60                                    |
| <i>LMM</i>                      | 67                 | tBCHA                           | 33                 | 413                                 | 2.62                                    |
| <i>DdMA</i>                     | 67                 | DdMA                            | 33                 | 557                                 | 2.75                                    |
| <i>Cddm</i>                     | 67                 | 2EhM                            | 33                 | 502                                 | 2.70                                    |
| <i>2EhM</i>                     | 25                 | HPhOPA                          | 75                 | 991                                 | 3.00                                    |
| <i>CM</i>                       | 25                 | PhMA                            | 75                 | 628                                 | 2.80                                    |
| <i>4IpbM</i>                    | 25                 | DEGMA                           | 75                 | 575                                 | 2.76                                    |
| <i>tBCHA</i>                    | 25                 | BnMA                            | 75                 | 400                                 | 2.60                                    |
| <i>DdMA</i>                     | 50                 | HPhOPA                          | 50                 | 911                                 | 2.96                                    |
| <i>2EhM</i>                     | 50                 | PhMA                            | 50                 | 466                                 | 2.67                                    |

| <i>Monomer 1</i><br>(Figure S7) | <i>% monomer 1</i> | <i>Monomer 2</i><br>(Figure S7) | <i>% monomer 2</i> | <i>Measured F</i><br><i>mCherry</i> | <i>log measured F</i><br><i>mCherry</i> |
|---------------------------------|--------------------|---------------------------------|--------------------|-------------------------------------|-----------------------------------------|
| <i>CM</i>                       | 50                 | DEGMA                           | 50                 | 545                                 | 2.74                                    |
| <i>4IpbM</i>                    | 50                 | BnMA                            | 50                 | 326                                 | 2.51                                    |
| <i>CHMA</i>                     | 67                 | GM                              | 33                 | 315                                 | 2.50                                    |
| <i>tBCHA</i>                    | 67                 | PM                              | 33                 | 592                                 | 2.77                                    |
| <i>EGDPEA</i>                   | 67                 | 4NbM                            | 33                 | 1512                                | 3.18                                    |
| <i>CiM</i>                      | 67                 | CiM                             | 33                 | 238                                 | 2.38                                    |
| <i>4IpbM</i>                    | 67                 | CHMA                            | 33                 | 341                                 | 2.53                                    |
| <i>CM</i>                       | 67                 | PM                              | 33                 | 702                                 | 2.85                                    |
| <i>PM</i>                       | 67                 | CiM                             | 33                 | 249                                 | 2.40                                    |
| <i>2EhM</i>                     | 67                 | CHMA                            | 33                 | 415                                 | 2.62                                    |
| <i>GM</i>                       | 67                 | GM                              | 33                 | 417                                 | 2.62                                    |
| <i>DdMA</i>                     | 67                 | PM                              | 33                 | 769                                 | 2.89                                    |
| <i>Cddm</i>                     | 67                 | 4NbM                            | 33                 | 615                                 | 2.79                                    |
| <i>CiM</i>                      | 100                |                                 |                    | 185                                 | 2.27                                    |
| <i>CHMA</i>                     | 100                |                                 |                    | 244                                 | 2.39                                    |
| <i>4NbM</i>                     | 254                | HPhOPA                          | 75                 | 1930                                | 3.29                                    |
| <i>CiM</i>                      | 25                 | PhMA                            | 75                 | 373                                 | 2.57                                    |
| <i>CHMA</i>                     | 25                 | DEGMA                           | 75                 | 487                                 | 2.69                                    |
| <i>GM</i>                       | 25                 | MEdMSPNH                        | 75                 | 573                                 | 2.76                                    |
| <i>PM</i>                       | 50                 | HPhOPA                          | 50                 | 612                                 | 2.79                                    |
| <i>4NbM</i>                     | 50                 | PhMA                            | 50                 | 270                                 | 2.43                                    |
| <i>CiM</i>                      | 50                 | DEGMA                           | 50                 | 304                                 | 2.48                                    |
| <i>CHMA</i>                     | 67                 | PM                              | 33                 | 241                                 | 2.38                                    |
| <i>tBCHA</i>                    | 67                 | 4NbM                            | 33                 | 1021                                | 3.01                                    |
| <i>EGDPEA</i>                   | 67                 | CiM                             | 33                 | 251                                 | 2.40                                    |
| <i>CiM</i>                      | 67                 | CHMA                            | 33                 | 332                                 | 2.52                                    |
| <i>4MbM</i>                     | 67                 | GM                              | 33                 | 368                                 | 2.57                                    |
| <i>4NbM</i>                     | 67                 | PM                              | 33                 | 2990                                | 3.48                                    |

| <i>Monomer 1</i><br>( <i>Figure S7</i> ) | <i>% monomer 1</i> | <i>Monomer 2</i><br>( <i>Figure S7</i> ) | <i>% monomer 2</i> | <i>Measured F</i><br><i>mCherry</i> | <i>log measured F</i><br><i>mCherry</i> |
|------------------------------------------|--------------------|------------------------------------------|--------------------|-------------------------------------|-----------------------------------------|
| <i>CM</i>                                | 67                 | 4NbM                                     | 33                 | 1090                                | 3.04                                    |
| <i>4MpM</i>                              | 67                 | CiM                                      | 33                 | 258                                 | 2.41                                    |
| <i>PM</i>                                | 67                 | CHMA                                     | 33                 | 611                                 | 2.79                                    |
| <i>LMM</i>                               | 67                 | GM                                       | 33                 | 349                                 | 2.54                                    |
| <i>GM</i>                                | 67                 | PM                                       | 33                 | 620                                 | 2.79                                    |
| <i>DdMA</i>                              | 67                 | 4NbM                                     | 33                 | 416                                 | 2.62                                    |
| <i>Cddm</i>                              | 67                 | CiM                                      | 33                 | 322                                 | 2.51                                    |
| <i>GM</i>                                | 100                |                                          |                    | 333                                 | 2.52                                    |
| <i>CiM</i>                               | 25                 | HPhOPA                                   | 75                 | 496                                 | 2.70                                    |
| <i>CHMA</i>                              | 25                 | PhMA                                     | 75                 | 483                                 | 2.68                                    |
| <i>GM</i>                                | 25                 | BnMA                                     | 75                 | 409                                 | 2.61                                    |
| <i>PM</i>                                | 25                 | MEdMSPNH                                 | 75                 | 3849                                | 3.59                                    |
| <i>CiM</i>                               | 50                 | PhMA                                     | 50                 | 429                                 | 2.63                                    |
| <i>CHMA</i>                              | 50                 | DEGMA                                    | 50                 | 405                                 | 2.61                                    |
| <i>tBCHA</i>                             | 67                 | CiM                                      | 33                 | 288                                 | 2.46                                    |
| <i>EGDPEA</i>                            | 67                 | CHMA                                     | 33                 | 293                                 | 2.47                                    |
| <i>4IpbM</i>                             | 67                 | GM                                       | 33                 | 345                                 | 2.54                                    |
| <i>4MbM</i>                              | 67                 | PM                                       | 33                 | 697                                 | 2.84                                    |
| <i>4NbM</i>                              | 67                 | 4NbM                                     | 33                 | 2136                                | 3.33                                    |
| <i>CM</i>                                | 67                 | CiM                                      | 33                 | 264                                 | 2.42                                    |
| <i>4MpM</i>                              | 67                 | CHMA                                     | 33                 | 492                                 | 2.69                                    |
| <i>2EhM</i>                              | 67                 | GM                                       | 33                 | 403                                 | 2.60                                    |
| <i>LMM</i>                               | 67                 | PM                                       | 33                 | 697                                 | 2.84                                    |
| <i>GM</i>                                | 67                 | 4NbM                                     | 33                 | 2543                                | 3.41                                    |
| <i>DdMA</i>                              | 67                 | CiM                                      | 33                 | 437                                 | 2.64                                    |
| <i>Cddm</i>                              | 67                 | CHMA                                     | 33                 | 455                                 | 2.66                                    |
| <i>PM</i>                                | 100                |                                          |                    | 590                                 | 2.77                                    |
| <i>CHMA</i>                              | 25                 | HPhOPA                                   | 75                 | 1005                                | 3.00                                    |

| <i>Monomer 1</i><br>( <i>Figure S7</i> ) | <i>% monomer 1</i> | <i>Monomer 2</i><br>( <i>Figure S7</i> ) | <i>% monomer 2</i> | <i>Measured F</i><br><i>mCherry</i> | <i>log measured F</i><br><i>mCherry</i> |
|------------------------------------------|--------------------|------------------------------------------|--------------------|-------------------------------------|-----------------------------------------|
| <i>GM</i>                                | 25                 | DEGMA                                    | 75                 | 439                                 | 2.64                                    |
| <i>PM</i>                                | 25                 | BnMA                                     | 75                 | 585                                 | 2.77                                    |
| <i>4NbM</i>                              | 25                 | MEdMSPNH                                 | 75                 | 653                                 | 2.81                                    |
| <i>CiM</i>                               | 50                 | HPhOPA                                   | 50                 | 295                                 | 2.47                                    |
| <i>CHMA</i>                              | 50                 | PhMA                                     | 50                 | 263                                 | 2.42                                    |
| <i>GM</i>                                | 50                 | BnMA                                     | 50                 | 478                                 | 2.68                                    |
| <i>CHMA</i>                              | 67                 | CiM                                      | 33                 | 214                                 | 2.33                                    |
| <i>tBCHA</i>                             | 67                 | CHMA                                     | 33                 | 491                                 | 2.69                                    |
| <i>CiM</i>                               | 67                 | GM                                       | 33                 | 298                                 | 2.47                                    |
| <i>4IpbM</i>                             | 67                 | PM                                       | 33                 | 351                                 | 2.54                                    |
| <i>4NbM</i>                              | 67                 | CiM                                      | 33                 | 1146                                | 3.06                                    |
| <i>CM</i>                                | 67                 | CHMA                                     | 33                 | 683                                 | 2.83                                    |
| <i>PM</i>                                | 67                 | GM                                       | 33                 | 545                                 | 2.74                                    |
| <i>2EhM</i>                              | 67                 | PM                                       | 33                 | 559                                 | 2.75                                    |
| <i>LMM</i>                               | 67                 | 4NbM                                     | 33                 | 618                                 | 2.79                                    |
| <i>GM</i>                                | 67                 | CiM                                      | 33                 | 387                                 | 2.59                                    |
| <i>DdMA</i>                              | 67                 | CHMA                                     | 33                 | 471                                 | 2.67                                    |
| <i>CHMA</i>                              | 75                 | MEdMSPNH                                 | 25                 | 322                                 | 2.51                                    |
| <i>GM</i>                                | 25                 | PhMA                                     | 75                 | 425                                 | 2.63                                    |
| <i>PM</i>                                | 25                 | DEGMA                                    | 75                 | 1136                                | 3.06                                    |
| <i>4NbM</i>                              | 25                 | BnMA                                     | 75                 | 816                                 | 2.91                                    |
| <i>CiM</i>                               | 25                 | MEdMSPNH                                 | 75                 | 277                                 | 2.44                                    |
| <i>CHMA</i>                              | 50                 | HPhOPA                                   | 50                 | 812                                 | 2.91                                    |
| <i>GM</i>                                | 50                 | DEGMA                                    | 50                 | 628                                 | 2.80                                    |
| <i>PM</i>                                | 50                 | BnMA                                     | 50                 | 914                                 | 2.96                                    |
| <i>CHMA</i>                              | 67                 | CHMA                                     | 33                 | 289                                 | 2.46                                    |
| <i>EGDPEA</i>                            | 67                 | GM                                       | 33                 | 414                                 | 2.62                                    |
| <i>CiM</i>                               | 67                 | PM                                       | 33                 | 222                                 | 2.35                                    |

| <i>Monomer 1</i><br>( <i>Figure S7</i> ) | <i>% monomer 1</i> | <i>Monomer 2</i><br>( <i>Figure S7</i> ) | <i>% monomer 2</i> | <i>Measured F</i><br><i>mCherry</i> | <i>log measured F</i><br><i>mCherry</i> |
|------------------------------------------|--------------------|------------------------------------------|--------------------|-------------------------------------|-----------------------------------------|
| <i>4IpbM</i>                             | 67                 | 4NbM                                     | 33                 | 1118                                | 3.05                                    |
| <i>4MbM</i>                              | 67                 | CiM                                      | 33                 | 348                                 | 2.54                                    |
| <i>4MpM</i>                              | 67                 | GM                                       | 33                 | 430                                 | 2.63                                    |
| <i>PM</i>                                | 67                 | PM                                       | 33                 | 202                                 | 2.31                                    |
| <i>2EhM</i>                              | 67                 | 4NbM                                     | 33                 | 793                                 | 2.90                                    |
| <i>LMM</i>                               | 67                 | CiM                                      | 33                 | 341                                 | 2.53                                    |
| <i>GM</i>                                | 67                 | CHMA                                     | 33                 | 418                                 | 2.62                                    |
| <i>Cddm</i>                              | 67                 | GM                                       | 33                 | 383                                 | 2.58                                    |
| <i>GM</i>                                | 25                 | HPhOPA                                   | 75                 | 835                                 | 2.92                                    |
| <i>PM</i>                                | 25                 | PhMA                                     | 75                 | 619                                 | 2.79                                    |
| <i>4NbM</i>                              | 25                 | DEGMA                                    | 75                 | 746                                 | 2.87                                    |
| <i>CiM</i>                               | 25                 | BnMA                                     | 75                 | 437                                 | 2.64                                    |
| <i>CHMA</i>                              | 25                 | MEdMSPNH                                 | 75                 | 529                                 | 2.72                                    |
| <i>GM</i>                                | 50                 | PhMA                                     | 50                 | 355                                 | 2.55                                    |
| <i>PM</i>                                | 50                 | DEGMA                                    | 50                 | 279                                 | 2.45                                    |
| <i>tBCHA</i>                             | 67                 | GM                                       | 33                 | 263                                 | 2.42                                    |
| <i>EGDPEA</i>                            | 67                 | PM                                       | 33                 | 242                                 | 2.38                                    |
| <i>CiM</i>                               | 67                 | 4NbM                                     | 33                 | 275                                 | 2.44                                    |
| <i>4IpbM</i>                             | 67                 | CiM                                      | 33                 | 418                                 | 2.62                                    |
| <i>4MbM</i>                              | 67                 | CHMA                                     | 33                 | 338                                 | 2.53                                    |
| <i>CM</i>                                | 67                 | GM                                       | 33                 | 589                                 | 2.77                                    |
| <i>4MpM</i>                              | 67                 | PM                                       | 33                 | 624                                 | 2.79                                    |
| <i>PM</i>                                | 67                 | 4NbM                                     | 33                 | 1451                                | 3.16                                    |
| <i>2EhM</i>                              | 67                 | CiM                                      | 33                 | 339                                 | 2.53                                    |
| <i>LMM</i>                               | 67                 | CHMA                                     | 33                 | 505                                 | 2.70                                    |
| <i>DdMA</i>                              | 67                 | GM                                       | 33                 | 536                                 | 2.73                                    |
| <i>Cddm</i>                              | 67                 | PM                                       | 33                 | 680                                 | 2.83                                    |
| <i>PM</i>                                | 25                 | HPhOPA                                   | 75                 | 942                                 | 2.97                                    |

| <i>Monomer 1</i><br>( <i>Figure S7</i> ) | <i>% monomer 1</i> | <i>Monomer 2</i><br>( <i>Figure S7</i> ) | <i>% monomer 2</i> | <i>Measured F</i><br><i>mCherry</i> | <i>log measured F</i><br><i>mCherry</i> |
|------------------------------------------|--------------------|------------------------------------------|--------------------|-------------------------------------|-----------------------------------------|
| <i>4NbM</i>                              | 25                 | PhMA                                     | 75                 | 798                                 | 2.90                                    |
| <i>CiM</i>                               | 25                 | DEGMA                                    | 75                 | 499                                 | 2.70                                    |
| <i>CHMA</i>                              | 25                 | BnMA                                     | 75                 | 472                                 | 2.67                                    |
| <i>GM</i>                                | 50                 | HPhOPA                                   | 50                 | 707                                 | 2.85                                    |
| <i>PM</i>                                | 50                 | PhMA                                     | 50                 | 303                                 | 2.48                                    |
| <i>4NbM</i>                              | 50                 | DEGMA                                    | 50                 | 578                                 | 2.76                                    |
| <i>CiM</i>                               | 50                 | BnMA                                     | 50                 | 100                                 | 2.00                                    |

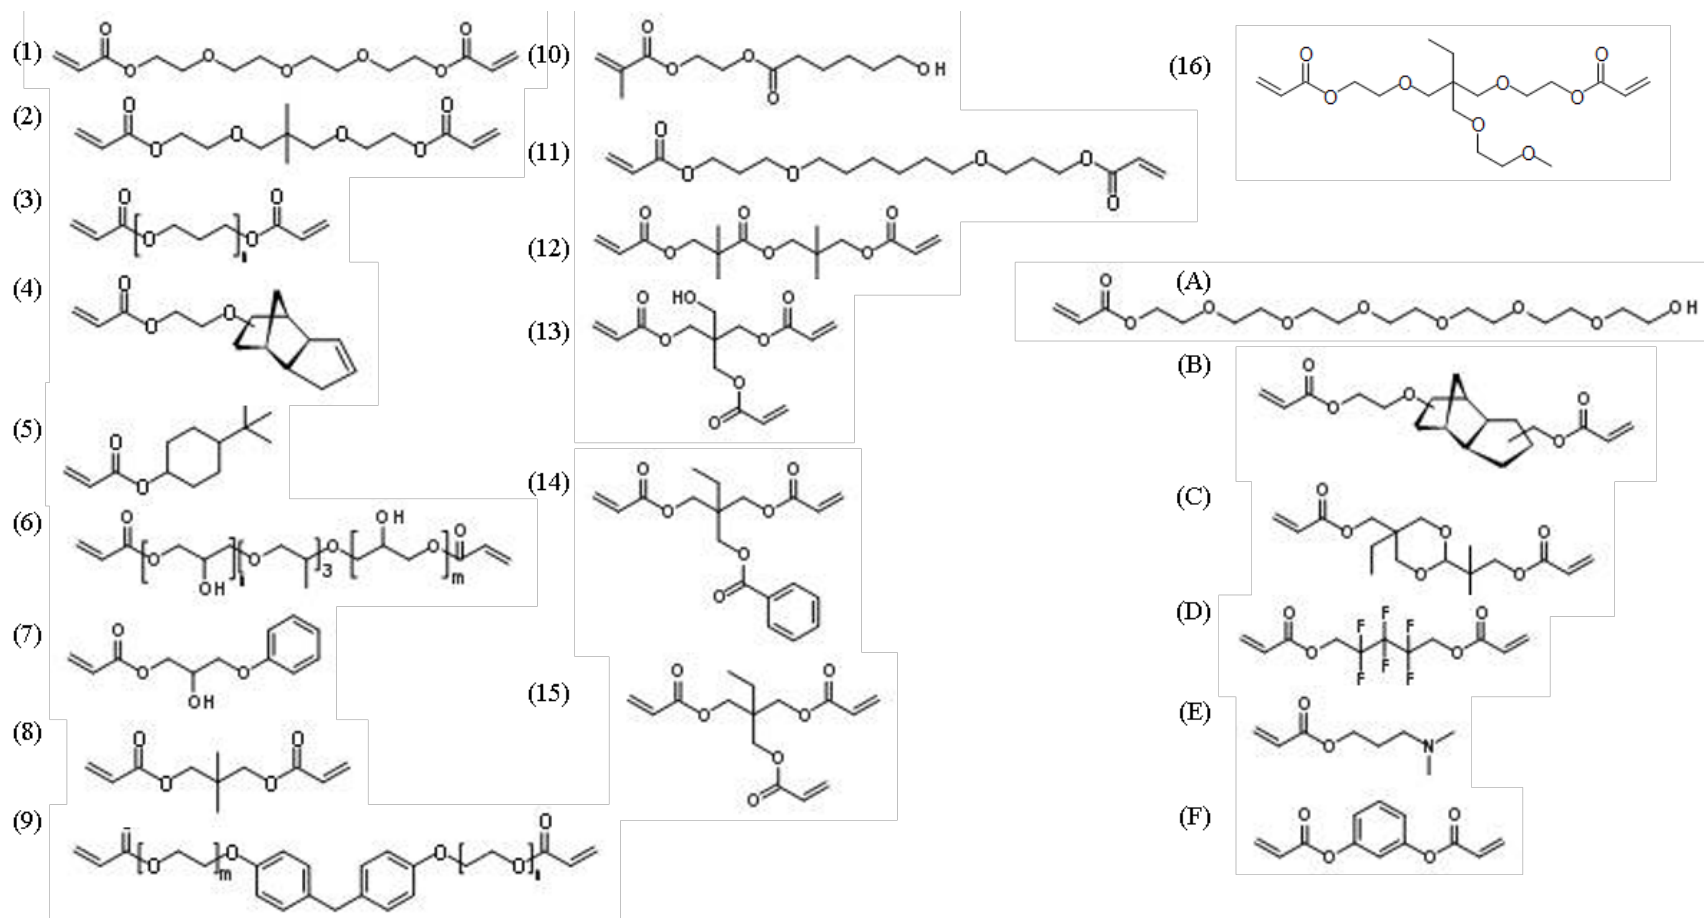

**Figure S1.** Monomer structures of commercially available compounds employed in the micro array fabrication. The co-polymers were formed by combining monomers 1-15 with monomers A-F in different volume ratios then exposing the mixture to UV.



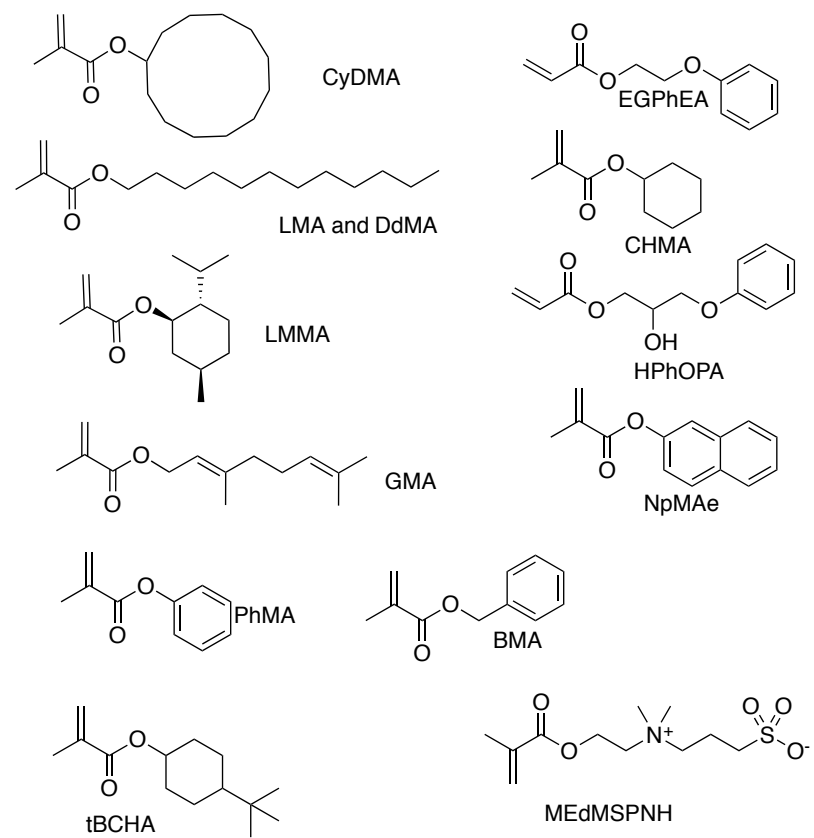

**Figure S2.** Structures of monomers used to generate smaller polymer library used to validate model predictions for mCherry-transformed pathogens

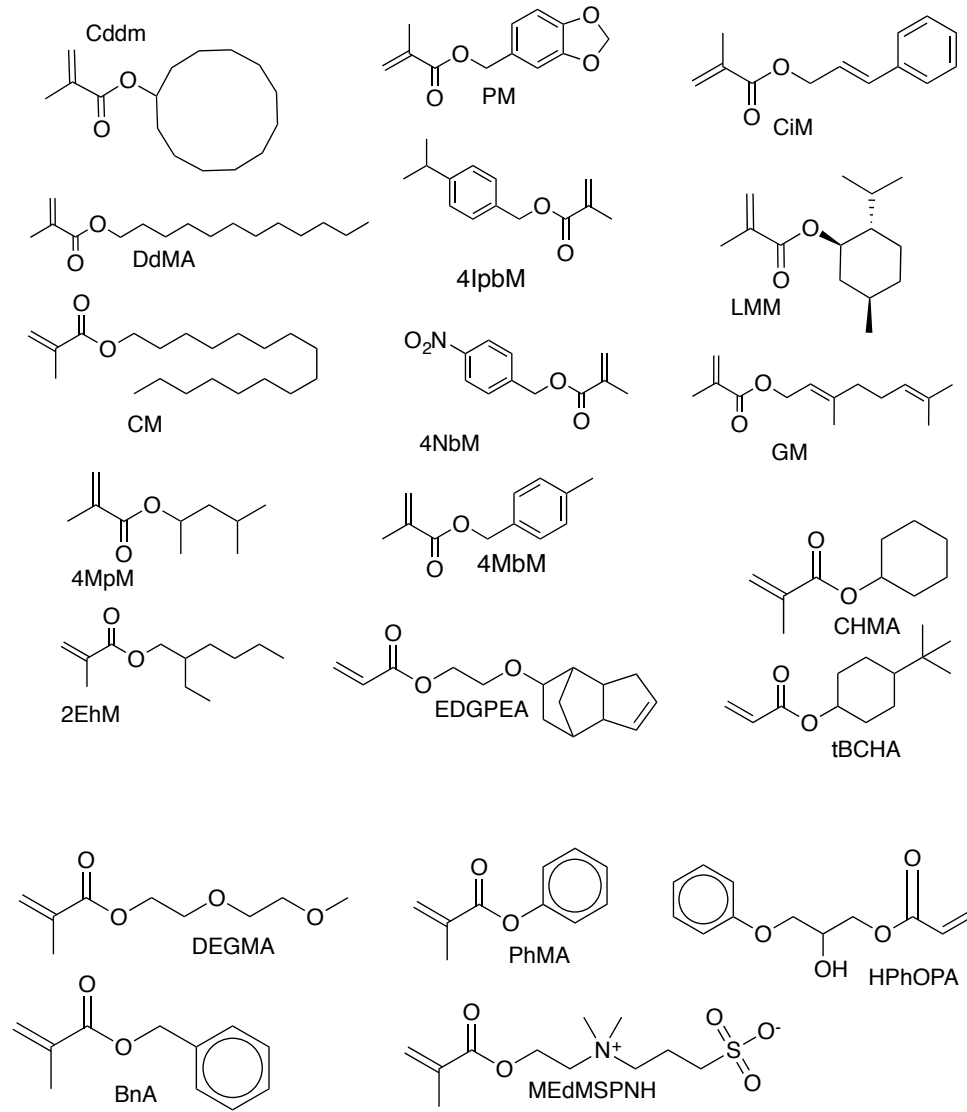

**Figure S3.** Structures of monomers used to generate larger polymer library used to validate model predictions for mCherry-transformed pathogens

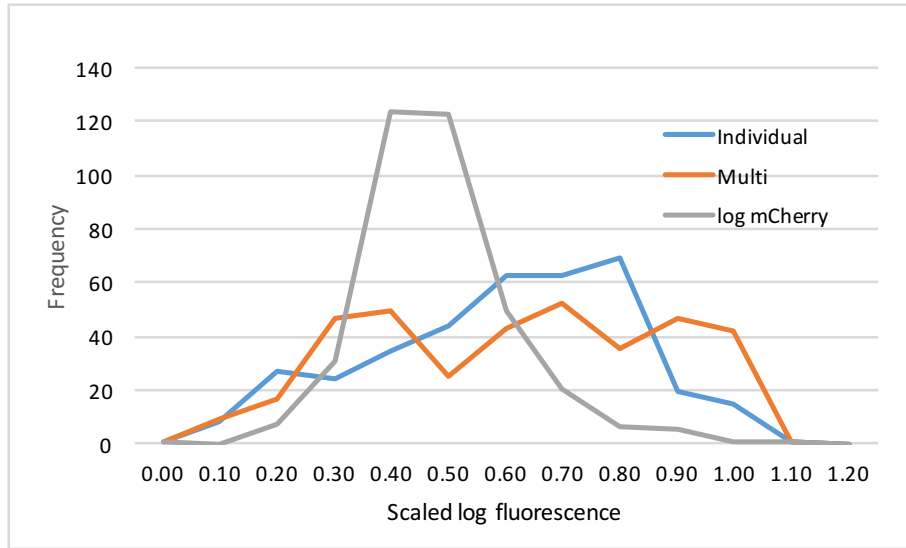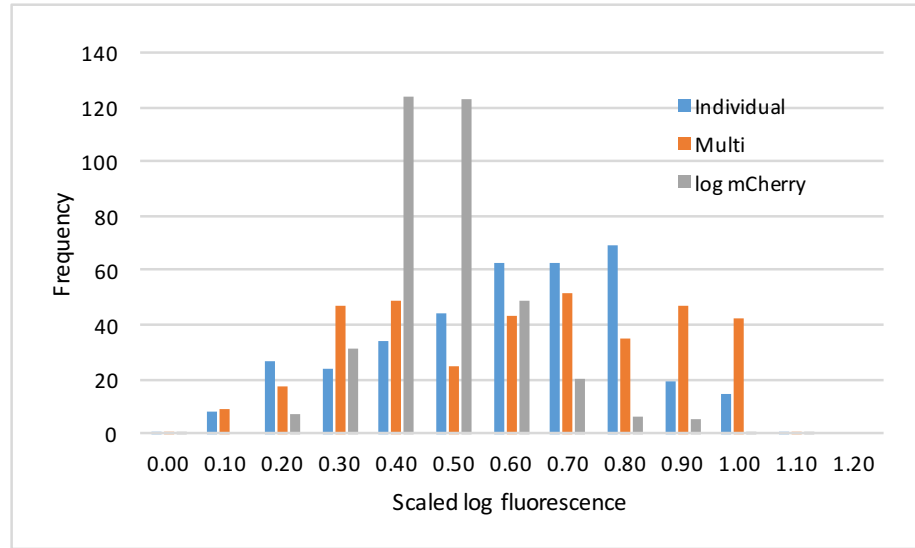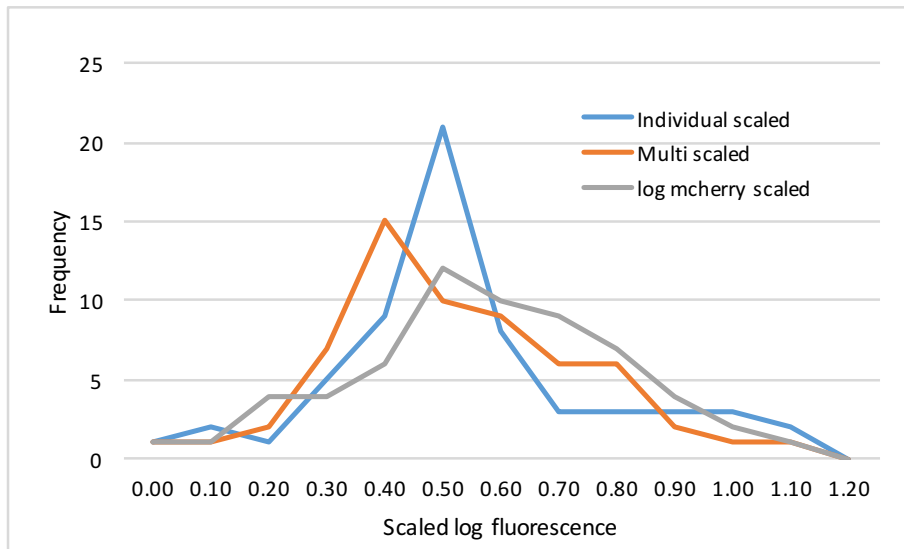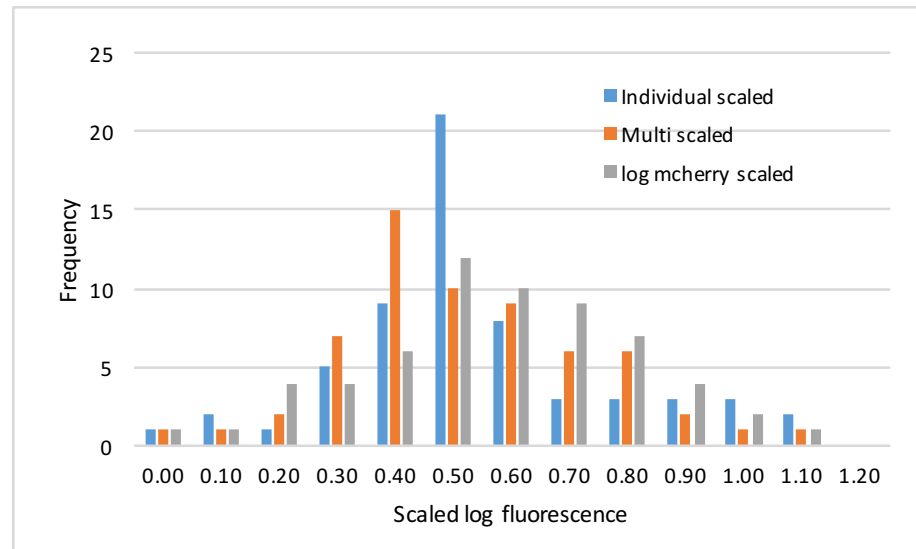

**Figure S4.** Graph (left) and histograms (right) of distributions of normalized pathogen adhesion predicted by the individual, multi-pathogen and log mCherry fluorescence data for PA (top panels) and UPEC (bottom panels).

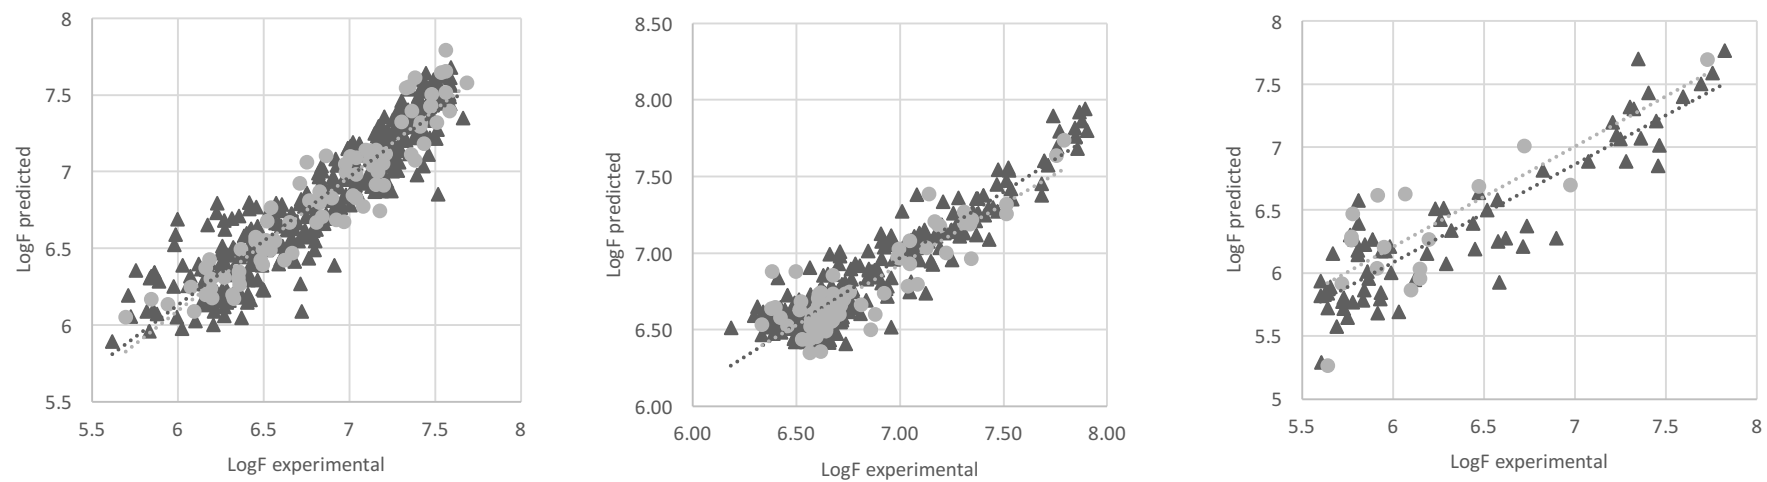

**Figure S5.** Measured and predicted attachment of PA, SA and UPEC for individual pathogens using molecular descriptors, training set (triangles), test set (circles).

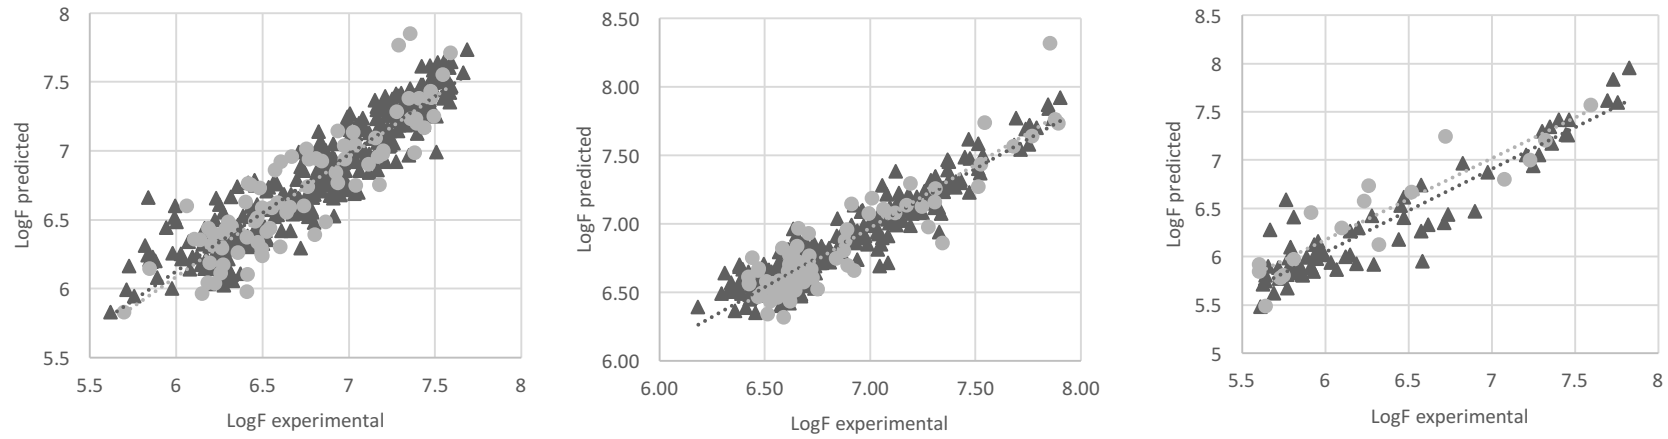

**Figure S6.** Measured and predicted attachment of PA, SA and UPEC for individual pathogens using experimental feature descriptors, training set (triangles), test set (circles).

**PA attachment**

Polymer array 1

**Multi-pathogen model**

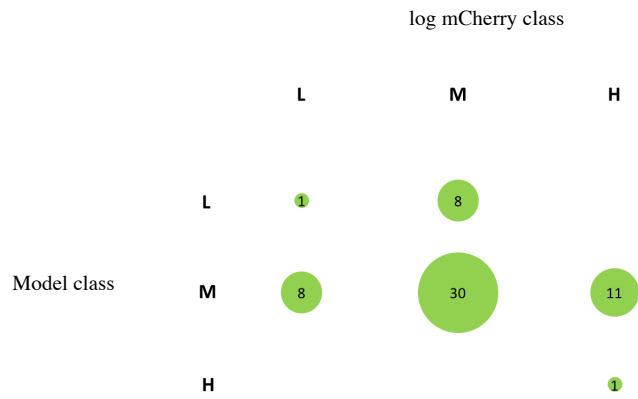

**Individual pathogen model**

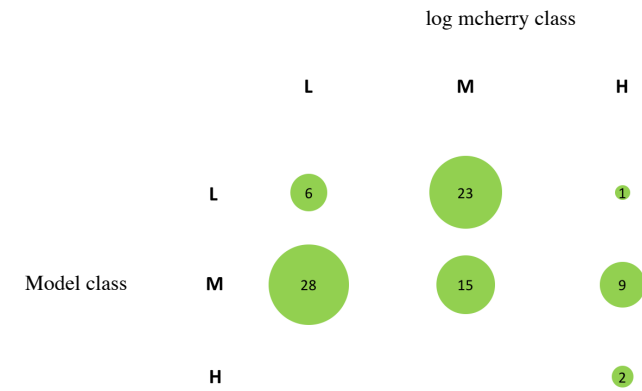



Polymer array 2

### Multi-pathogen model

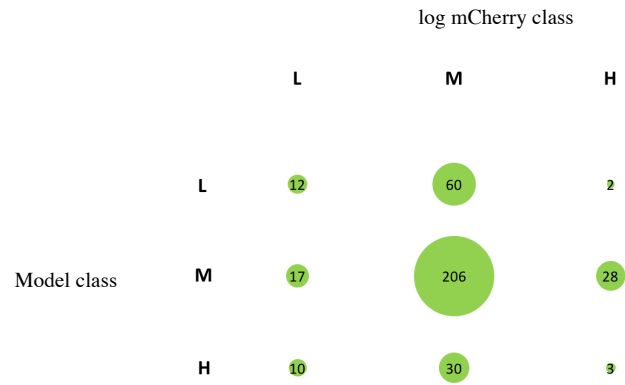

### Individual pathogen model

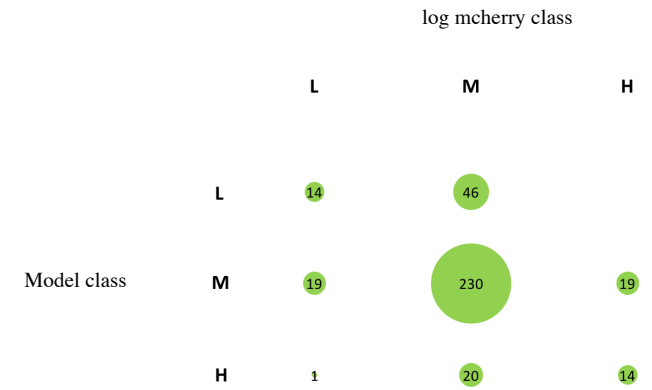

## UPEC

Polymer array 1

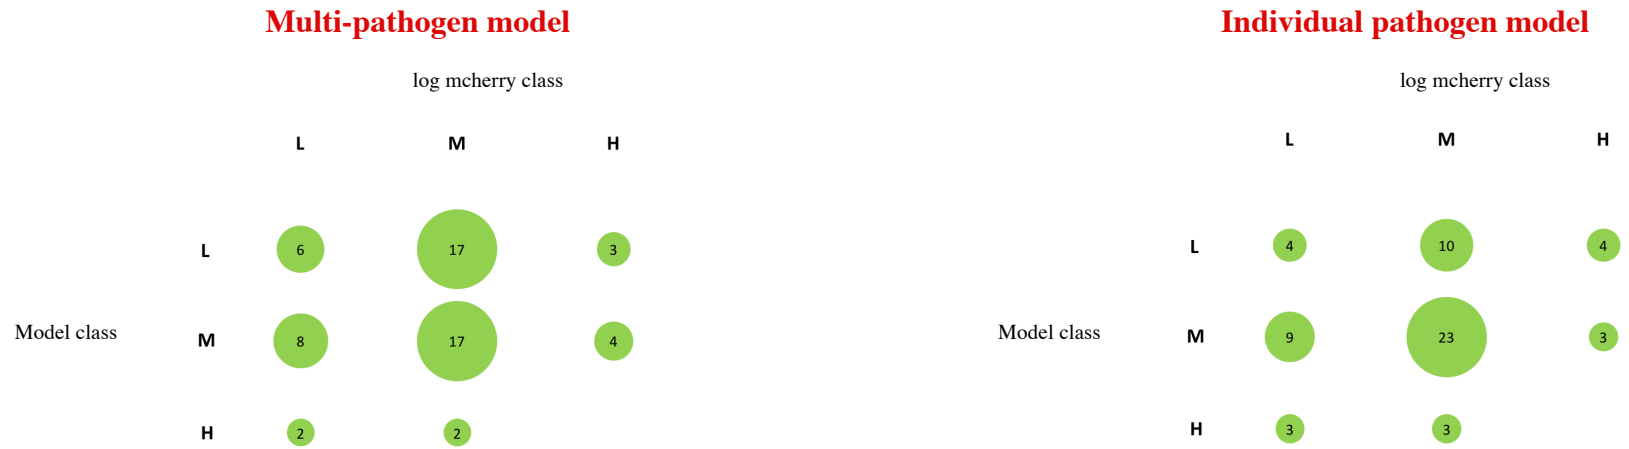

**Figure S7.** Truth tables for the three class predictions of pathogen attachment to a new polymer array where the pathogen adhesion was assessed by the brightness of the mCherry fluorescence.

## References

1. Labute, P., A widely applicable set of descriptors. *J. Mol. Graph. Model.* **2000**, *18* (4-5), 464-477.
2. Raychaudhury, C.; Ray, S. K.; Ghosh, J. J.; Roy, A. B.; Basak, S. C., Discrimination of Isomeric Structures Using Information Theoretic Topological Indexes. *J. Comput. Chem.* **1984**, *5* (6), 581-588.
